# Supplementary material for: Contribution of VEGF-B-Induced Endocardial Endothelial Cell Lineage in Physiological Versus Pathological Cardiac Hypertrophy
Source: PubMed Central journal article supplement (PMC11542978; doi:10.1161/circresaha.123.324136), 2024-04-24
Supplement: res-134-1465-s008.pdf [file res-134-1465-s008.pdf]

1 **Contribution of VEGF-B-induced endocardial endothelial cell lineage in physiological**  
2 **versus pathological cardiac hypertrophy**  
3 **(Supplemental material)**

4  
5 Ibrahim Sultan<sup>1,2</sup>, MSc, Markus Ramste<sup>#1,2</sup>, MD, PhD, Pim Peletier<sup>#1,2</sup>, MSc, Karthik  
6 Amudhala Hemanthakumar<sup>1,2</sup>, PhD, Deepak Ramanujam<sup>3,8</sup>, PhD, Annakaisa Tirronen<sup>4</sup>,  
7 PhD, Ylva von Wright<sup>1,2</sup>, MSci, Salli Antila<sup>1,2</sup>, MD, Pipsa Saharinen<sup>1,2</sup>, PhD, Lauri Eklund<sup>5</sup>,  
8 PhD, Eero Mervaala<sup>6</sup>, MD, PhD, Seppo Ylä-Herttuala<sup>4</sup>, MD, PhD, Stefan Engelhardt<sup>3</sup>, MD,  
9 PhD, Riikka Kivelä<sup>1,7</sup>, PhD, and Kari Alitalo<sup>\*1,2</sup>, MD, PhD

10  
11 <sup>1</sup>Wihuri Research Institute and <sup>2</sup>Translational Cancer Medicine Program, Faculty of  
12 Medicine, Biomedicum Helsinki, University of Helsinki, Finland

13  
14 <sup>3</sup>Institute for Pharmacology and Toxicology, Technical University of Munich, and DZHK  
15 partner site Munich Heart Alliance, Munich, Germany

16  
17 <sup>4</sup>A.I. Virtanen Institute, University of Eastern Finland, Kuopio, Finland

18  
19 <sup>5</sup>Oulu Center for Cell-Matrix Research, Faculty of Biochemistry and Molecular Medicine,  
20 Biocenter Oulu, University of Oulu, Oulu, Finland

21  
22 <sup>6</sup>Department of Pharmacology, Faculty of Medicine, University of Helsinki, Finland

23  
24 <sup>7</sup>Stem Cells and Metabolism Research Program, Faculty of Medicine, University of Helsinki,  
25 and Faculty of Sport and Health Sciences, University of Jyväskylä, Finland

26  
27 <sup>8</sup>RNATICS GmbH, Planegg-Martinsried, Germany.

28  
29  
30 #Equal contribution

31 \*To whom correspondence should be addressed

32 Wihuri Research Institute

33 Haartmaninkatu 8, 00290 Helsinki, Finland

34 Tel: +358 2941 25510 Email: [kari.alitalo@helsinki.fi](mailto:kari.alitalo@helsinki.fi)

35  
36 Short title: VEGF-B induced coronary endothelial cell lineage

37  
38  
39  
40  
41  
42  
43  
44  
45

## 1 **Methods**

2 For a detailed list of reagents, equipment, and softwares used throughout the study, please  
3 check the major resources table.

4 **Mouse and rat models.** Mice and rats were maintained in a specific pathogen free,  
5 temperature-controlled environment with 12-h light/dark cycle and *ad libitum* diet. All  
6 procedures used in animal experiments were approved by the National Animal Experiment  
7 Board according to the regulations of the European Union and Finnish national legislation. We  
8 used aP2-VEGF-B mice<sup>1</sup> as a model of cardiac autocrine VEGF-B signaling as the FABP4  
9 (aP2) promoter is expressed in cardiac, but not in peripheral blood endothelial cells (ECs),  
10 thus avoiding the potentially toxic effects of high levels of VEGF-B in the systemic vasculature.  
11 The previously described  $\alpha$ MHC-VEGF-B<sup>2</sup>, Cdh5-CreER<sup>T23</sup>, VEGFR-1TK<sup>-/-4</sup>, VEGFR-1<sup>fl/fl5</sup>,  
12 VEGFR-2<sup>fl/fl6</sup>, Rosa26<sup>LSL-TdTomato</sup> (Jackson Laboratory, stock no. 021875), and BmxCreER<sup>T27</sup>  
13 mouse lines and  $\alpha$ MHC-VEGF-B<sup>2</sup> rats were used for the experiments. All mouse strains were  
14 maintained in the C57BL/6JRj background and the  $\alpha$ MHC-VEGF-B rats were maintained in  
15 HsdBrl:WH Wistar background. For adeno-associated virus vector (AAV) gene transfer, we  
16 used weight and age matched ( $\geq 10$ -week-old) WT C57BL/6JRj female mice that were  
17 purchased from Janvier labs. Upon arrival, the mice were left for a minimum of one week to  
18 acclimatize prior to commencement of the experiment. All observed findings were validated in  
19 both male and female mice. We established that sex was not a confounder nor an effect  
20 modifier. Accordingly, only female data was included from AAV experiments to allow  
21 comparison with data from pregnancy experiments. All single-cell RNA sequencing (scRNA-  
22 seq) datasets were acquired from female mice to allow comparison and integration of different  
23 datasets in the study. The numbers of mice used in each experiment are indicated in each  
24 figure legend. Quantifications were performed in a blinded manner. In AAV experiments, we  
25 excluded occasional mice that did not express the vector based on cardiac lysates RT-qPCR.  
26 We also investigated  $\alpha$ MHC-VEGF-B rats in which we made findings comparable to the  
27  $\alpha$ MHC-VEGF-B mice, including increased expression of VEGF-iEC marker transcripts in the  
28 adult heart and decreased VEGF-B<sub>167</sub> protein from heart lysates in comparison to VEGF-B<sub>186</sub>.

29  
30 **Tissue collection and animal sacrifice.** Mice and rats were terminally anesthetized using  
31 intraperitoneal (i.p.) injection of a 3:1 mixture of ketamine (50mg/ml) and xylazine (20mg/ml).  
32 We used a total volume of 100  $\mu$ l per mouse and 1ml per rat. Blood was collected from the  
33 left ventricle (LV) for serum/plasma isolation. For mice, a puncture was made in the right  
34 atrium, followed by injection of 200  $\mu$ l of 40 mM KCl to the LV to stop heartbeats, followed by  
35 tissue isolation and gravimetry. Using a scalpel, the hearts were transversally divided into two  
36 equal parts. The upper part was embedded in OCT (Catalogue #45830, Histolab) and snap-  
37 frozen in 2-methylbutane containing 2% pentane cooled in liquid nitrogen. The lower half of  
38 the apex was snap-frozen in liquid nitrogen for biochemical and molecular analyses. For  
39 mouse phenotyping, approximately 50 mg tissues of interest were collected and snap-frozen  
40 in liquid nitrogen for molecular analyses. For immunohistochemical analysis of mouse and rat  
41 tissues, the tissues were isolated and fixed using 4% paraformaldehyde (PFA) in PBS  
42 overnight at 4°C, with the exception of adipose tissue, which was fixed for two days at 4°C.  
43 For paraffin embedding, the tissues were further processed using Tissue-tek VIP5 Jr.  
44 (Sakura). The hearts of mouse pups were washed with PBS and fixed for 60 min in 4% PFA  
45 at 4°C, washes with PBS and incubated overnight in 30% sucrose in PBS, then embedded in  
46 OCT blocks on dry ice and cryo-sectioned using CryoStar NX70 HOMVPD cryotome.

1 **Isolation of cardiac cell types for RT-qPCR validation of VEGF-B expression.** Cardiac  
2 ECs, cardiac fibroblasts (CFs), and CMCs were isolated as described previously<sup>8</sup>. The hearts  
3 were harvested and coronary arteries were perfused briefly with buffer A (113 mM NaCl, 4.7  
4 mM KCl, 0.6 mM KH<sub>2</sub>PO<sub>4</sub>, 0.6 mM Na<sub>2</sub>HPO<sub>4</sub>, 1.2 mM MgSO<sub>4</sub>, 12 mM NaHCO<sub>3</sub>, 10 mM KHCO<sub>3</sub>,  
5 10 mM HEPES and 30 mM taurine) to remove blood in a retrograde manner by cannulating  
6 the aorta; then collagenase type II (Worthington) was added to dissociate the ventricular cells.  
7 The dissociated cells were allowed to sediment at 37°C for 10 min to allow CMCs to settle  
8 down as a pellet, leaving behind a non-myocyte rich supernatant, which was treated with rat  
9 anti-mouse CD16/CD32 antibodies (1:100, #BDB553142, clone 2.4G2, BD Biosciences) at  
10 4°C for 20 min before being incubated with fluorophore-conjugated antibodies at 4°C for 30  
11 min. The following antibodies were used: anti-CD45-FITC (1:100, #60030Fl.1, clone 30-F11,  
12 STEMCELL Technologies), anti-PDGFR-PECy7 (1:100, #25-1401-82, clone APA5,  
13 Invitrogen), and anti-CD105-PE (1:100, #12-1051-82, clone MJ7/18, Invitrogen). Cell  
14 suspensions were triturated through a 40 µm Nylon cell strainer (Falcon) and then subjected  
15 to flow cytometry-based sorting using the Biorad S3e cell sorter.

16 **RNA isolation and quantitative real-time PCR (RT-qPCR).** Tissues were homogenized with  
17 Trisure reagent (#BIO-38032, Bioline) in zirconium oxide bead tubes (#MB2ZO15, Next  
18 Advance Inc.) and RNA was isolated according to manufacturer's instructions using  
19 Nucleospin RNA II Kit (#740984, Macherey-Nagel). For RNA isolation from cells, the  
20 manufacturer's instructions were followed, except that β-mercaptoethanol was added to the  
21 RA1 lysis buffer. The quality of the RNA was determined using the Nanodrop ND-1000  
22 instrument (Thermo Fisher Scientific), and 1 µg of total RNA was used for cDNA synthesis  
23 using the High-Capacity cDNA Reverse Transcription Kit (#10400745, Applied Biosystems).  
24 RT-qPCR was performed using FastStart Universal SYBR Green Master kit (#4913914001,  
25 Roche) and BIO-RAD C1000 thermal cycler according to the standardized protocol. The Eq.  
26 2-ΔΔCt method was used to quantify relative gene expression levels. Technical duplicates  
27 Cq values were averaged for each sample and normalized to the *Hprt* housekeeping gene.  
28 Expression levels of mRNA are presented as fold change (control group=1). All used primers  
29 are listed in **Supplemental table 4**.

30 **Genotyping and PCR.** Ear clips were isolated from the animals and subsequently boiled for  
31 5 min in 50 mM NaOH, followed by spinning down at 13 000 rpm and using 1µl of the  
32 supernatant for PCR reaction using protocol of KAPA2G Fast Hotstart genotyping Mix  
33 (#kk5621, Kapa Biosystems). To check for the presence of either VEGF-B isoform-specific  
34 transcripts in the hearts of the aP2-VEGF-B, αMHC-VEGF-B and WT mice, separate PCR  
35 reactions were run on cardiac lysates cDNA using primers that amplify both mVEGF-B  
36 isoforms or the hVEGF-B isoforms. KAPA2G Fast Hotstart genotyping Mix (#kk5621, Kapa  
37 Biosystems) was used for amplification of the PCR products. The PCR reaction products were  
38 subjected to 3% agarose gel electrophoresis to visualize the products. All used primers are  
39 listed in **Supplemental table 4**.

40 **Immunohistochemistry.** Adult hearts that were OCT embedded without fixation were  
41 sectioned at 7 µm thickness and were left on glass slides to air dry for 20 min. The sections  
42 were then fixed using 4% PFA in PBS for 15 min at room temperature (RT), followed by  
43 washes in PBS. The pre-fixed hearts from pups were sectioned at 10 µm thickness followed  
44 by PBS washing. Paraffin-embedded tissues were sectioned at 5 µm, deparaffinized and  
45 rehydrated. Antigen retrieval was then performed using microwave boiling of the sections in

1 (10 mM Tris, 1 mM EDTA, and 0.05% Tween20 in PBS, pH 9.0) for 15 min total, followed by  
2 washing in PBS.

3 Blocking of sections was performed using immunomix (0.5%BSA, 5%donkey serum and  
4 0.1%triton in PBS) for 60 min at RT. The sections were then incubated overnight with primary  
5 antibodies in immunomix at 4°C. The following primary antibodies were used: goat anti-mouse  
6 VEGF-B (1:250, #AF590, R&D Systems), rabbit anti-mouse FABP4 (1:200, #ab13979,  
7 Abcam), rat anti-mouse Plvap (1:150, #553849, BD Biosciences), goat anti-mouse  
8 podocalyxin (1:200, #AF1556, R&D Systems), mouse anti-mouse Dystrophin (1:200, #NCL-  
9 DYS2, Leica Biosystems), rat anti-mouse Cd31 (1:100, #553370, BD Biosciences), rabbit anti-  
10 mouse Cd45 (1:250, #10558, Abcam), goat anti-mouse Cd206 (1:1000, #AF2535, R&D  
11 Systems), rabbit anti-human Col13a1 (1:75, #HPA050392, Atlas Antibodies), mouse anti-  
12 mouse Actin  $\alpha$ -Smooth Muscle-Cy3 conjugated (1:1000, #C6198, Sigma-Aldrich), mouse anti-  
13 human Nr2f2 (1:150, #PP-H7147-00, R&D Systems), goat anti-mouse Dll4 (1:100, # AF1389,  
14 R&D Systems), and goat anti-mouse VEGFR-2 (1:250, #AF644, R&D Systems). The following  
15 day, the sections were rinsed with PBS, then incubated with the secondary antibody and  
16 Hoechst nuclear dye (#H3570, Invitrogen) in immunomix for 60 min at RT, followed by PBS  
17 washes and mounting using prolong gold mounting medium (#P36930, Invitrogen). The  
18 following secondary antibodies from Invitrogen were used at 1:500 dilution: Alexa-fluor488  
19 donkey anti-goat (#A-11055), Alexa-fluor488 donkey anti-rabbit (#A-21206), Alexa-fluor488  
20 donkey anti-mouse (#A-21202), Alexa-fluor488 donkey anti-rat (#A-21208), Alexa-fluor594  
21 donkey anti-rabbit (#A-21207), Alexa-fluor594 donkey anti-rat (#A-21209), Alexa-fluor594  
22 donkey anti-mouse (#A-21203), Alexa-fluor647 donkey anti-goat (#A-21447), and Alexa-  
23 fluor647 donkey anti-rat (#A78947). For validation of antibody specificity, only the secondary  
24 antibody was used as a control in order to distinguish genuine target staining from background.  
25 All immunohistochemical experiments included known negative and positive internal staining  
26 controls to validate the specificity. Masson trichrome staining was performed on cardiac  
27 cryosections using instructions provided by the manufacturer (#HT15-1KT, Sigma-Aldrich).  
28 Counterstaining was performed using Weigert's iron hematoxylin kit (#1.15973.0002, Sigma-  
29 Aldrich). The immunohistochemical stainings shown in the figures are the most representative  
30 of all the images captured from all samples acquired from the mouse cohorts used in the  
31 specified experiment.

32 **Whole mount staining and confocal microscopy.** The hearts were perfused with PBS  
33 followed by isolation and fixation overnight in 4% PFA at 4°C. On the following day, the hearts  
34 were rinsed and embedded in low melting point agarose and sectioned at 200  $\mu$ m thickness  
35 using Leica VT1000 S vibrating blade microtome. Blocking of cardiac thick sections was  
36 performed for 1 h at RT using immunomix, followed by incubation with the primary antibodies  
37 o.n. at 4°C. On the following day, the heart sections were rinsed for 2 h in PBS, followed by  
38 addition of secondary antibodies and Hoechst (#H3570, Invitrogen) o.n. at 4°C. The samples  
39 were finally washed for 2 h in PBS and mounted in Vectashield (Vector Laboratories  
40 NC9265087). Imaging was performed in the Biomedicum Imaging Unit (BIU) of the University  
41 of Helsinki, using Leica Stellaris 8 FALCON/DLS or Leica TCS SP8XI. Images were acquired  
42 with optimal z-stack step size. All images were acquired using sequential scanning and the  
43 value of 2 for averaging. The following primary antibodies were used for staining: goat anti-  
44 mouse podocalyxin (1:200, #AF1556, R&D Systems), rat anti-mouse Cd24 (1:500, #14-0242-  
45 82, Invitrogen), rabbit anti-mouse Plvap (1:100, #82489, Cell Signaling), goat anti-RFP (1:250,  
46 # 200-101-379, Rockland) and the following secondary antibodies were: Alexa-fluor488  
47 donkey anti-goat (#A-11055), Alexa-fluor488 donkey anti-rabbit (#A-21206), Alexa-fluor594

1 donkey anti-goat (#A-11058), and Alexa-fluor594 donkey anti-rat (#A-21209). For validation  
2 of antibody specificity, only the secondary antibody was used as a control in order to  
3 distinguish genuine target staining from background. All immunohistochemical experiments  
4 included known negative and positive internal staining controls to validate the specificity. The  
5 images presented in the figures are the most representative images or tile scans that were  
6 acquired from the mouse cohorts used in each experiment.

7 **Protein isolation and Western blotting analysis.** Hearts were lysed in RIPA buffer (50 mM  
8 Tris pH 7.4, 1% NP-40, 0.25% Na-deoxycholate, 150 mM NaCl, 1mM EDTA). ECs were lysed  
9 in PLCLB buffer (50 mM HEPES, 150 mM NaCl, 10% glycerol, 1% TritonX-100, 1.5 mM MgCl<sub>2</sub>,  
10 1 mM EGTA, 10 mM Na<sub>4</sub>P<sub>2</sub>O<sub>7</sub>, 100 mM NaF). Both buffers were supplemented with EASYpack  
11 protease and phospho-protease inhibitors (#04693132001 and #04906837001, Roche).  
12 Bicinchoninic acid (BCA) protein assay (#23225, Thermo Scientific) was used to determine  
13 the total protein content. The reaction was detected using EnSight Multimode plate reader. 25  
14 µg from the heart lysates, and 10 µg from ECs were loaded to Novex WedgeWell 4–20%  
15 TRIS-Glycine gel (#XP04205BOX, Invitrogen), electrophoresed, and blotted to ImmobilonFL  
16 PVDF membranes (#IPFL00010, Merck Millipore) and ran in reduced conditions. We used  
17 PageRuler™ Prestained Protein Ladder (#26616, Thermo Scientific) to assist in size  
18 determination of the proteins of interest. However, we noted that in some cases correlation  
19 with the ladder exhibited slight shift from the literature-established sizes of the detected  
20 proteins. Detection of proteins was performed using the following primary antibodies: goat  
21 anti-mouse VEGF-B (1:1000, #AF590, R&D Systems), goat anti-human VEGF-B (1:1000,  
22 #AF751, R&D Systems), goat anti-mouse VEGFR-1 (1:1000, #AF471, R&D Systems), rabbit  
23 anti-human pVEGFR-1 (Y1213) (1:1000, #AF4170, R&D Systems), goat anti-mouse VEGFR-  
24 2 (1:1000, #AF644, R&D Systems), goat anti-mouse/rat Nrp-1 (1:1000, #AF566, R&D  
25 Systems), rabbit anti-mouse p-AKT (Ser473) (1:1000, #9271, Cell Signaling), rabbit anti-  
26 mouse AKT (1:1000, #9272, Cell Signaling), rabbit anti-mouse phospho-p44/42 MAPK  
27 (Erk1/2) (Thr202/Tyr204) (1:1000, #9101, Cell Signaling), rabbit anti-mouse p44/42 MAPK  
28 (Erk1/2) (1:1000, #9102, Cell Signaling), rabbit anti-mouse β-actin (1:10000, #4967, Cell  
29 Signaling), and mouse anti-HSC70 (1:10000, #SC-7298, Santa Cruz Biotechnology). The  
30 following secondary antibodies were used to probe the blots: HRP-labeled rabbit anti-goat  
31 (1:2000, #P0449, Dako) and HRP-labeled swine anti-rabbit (1:2000, #P0217, Dako). The blots  
32 were visualized with SuperSignal West Femto Maximum Sensitivity Substrate (#34096,  
33 ThermoFischer Scientific). HSC70 and β-actin were probed consecutively using IRDye 680RD  
34 donkey anti-mouse IgG (1:10000, #925-68024, LI-COR Biosciences) and IRDye 680RD  
35 donkey anti-rabbit IgG (1:10000, #926-68073, LI-COR Biosciences) and detected using LI-  
36 COR Odyssey Fc (LI-COR Biosciences). ImageStudio Lite (Version 5.2.5; LI-COR  
37 Biosciences) was used for densitometric analysis of the blots. Finally, all values were  
38 normalized to the sample loading control (HSC70/β-actin). The blots presented in the figures  
39 are representative of the results that are the most similar to the mean value. All uncropped  
40 blots are included in the supplemental material.

41 **Micro-computed tomography (µCT).** P0 hearts were obtained from the aP2-VEGF-B pups  
42 and their surviving WT littermates right after birth. The hearts were rinsed with PBS, then  
43 incubated with 5 units/ml heparin for 15 min to prevent blood clotting within the heart. The  
44 hearts were washed 3 times, 5 min each, with PBS, then fixed in 4% PFA for 4 h at RT with  
45 shaking, followed by washing with PBS 3 times for 5 min each and dehydrated for 2 h in each  
46 of 10%, 30%, 50%, and 70% ethanol in PBS. Finally, the hearts were stained with 0.3%  
47 phosphotungstic acid in 70% ethanol in PBS for 48 h then were immersed in 0.5 ml Eppendorf

1 tubes filled with 4% low melting point agarose. After agarose solidification, a few drops of 70%  
2 ethanol were added on top of the agarose to prevent cracking. Bruker SkyScan 1272 was  
3 used for scanning the hearts using 0.25 mm aluminum filter. Flat field correction was adjusted  
4 before scanning. Camera binning was set to 1x1 and image pixel (px) size to 2.2  $\mu\text{m}$ . The  
5 rotation step was set to 0.2° within the total of 180° and frame averaging was set to 6. TIFF  
6 images were acquired in 16-bit depth and NRecon 1.7.1.0 software was used to reconstruct  
7 the scanned hearts. The hearts were post-aligned in relation to reference scan. Ring Artifact  
8 Correction was set as required. Smoothing and Beam Hardening Correction were not used.  
9 The images were reconstructed using MeshLab 2022.02 software.

10 **Endothelial cell isolation and single-cell sequencing.** Cardiac ECs were isolated from  
11 adult mice as described previously<sup>9</sup>. Hearts from 2-3 mice per condition/genotype were  
12 digested and pooled, and subsequently treated as 1 sample. The viability of the FAC-sorted  
13 cardiac ECs/cells was determined using an automated cell counter (Luna, Logos Biosystems).  
14 The cells were loaded into Chromium Next GEM Single Cell 3' Chip v3.1 (Dual index) (10x  
15 Genomics, Pleasanton, CA) and gel beads in emulsion (GEM) generation was performed  
16 aiming at 10 000 cell captures/sample. Subsequent cDNA purification, amplification (11  
17 cycles), and library construction (sample index PCR 12 cycles for WT-EC and  $\alpha\text{MHC-VEGF-}$   
18  $\text{B-EC}$  samples, 13 cycles for  $\alpha\text{P2-VEGF-B-SVF}$  and  $\alpha\text{MHC-VEGF-B-SVF}$  samples, and 14  
19 cycles for all other samples) was performed as instructed. Sequencing of sample libraries was  
20 performed using the Illumina NovaSeq 6000 system S2 flow cell (Illumina) with the following  
21 read lengths: 28bp (Read 1), 10bp (i7 Index), 10 bp (i5 Index), and 90 bp (Read 2) resulting  
22 in 41 594 mean reads/cell for the WT-EC sample, 41 216 mean reads/cell for the  $\alpha\text{P2-VEGF-}$   
23  $\text{B-EC}$  sample, 38 608 mean reads/cell for the  $\alpha\text{MHC-VEGF-B-EC}$  sample, 53 568 mean  
24 reads/cell for the WT-SVF sample, 45 987 mean reads/cell for the  $\alpha\text{P2-VEGF-B-SVF}$  sample,  
25 46 834 mean reads/cell for the  $\alpha\text{MHC-VEGF-B-SVF}$  sample, 55 247 mean reads/cell for the  
26 WT pregnant sample, 70 868 mean reads/cell for the  $\alpha\text{MHC-VEGF-B}$  pregnant sample, 34  
27 496 mean reads/cell for the WT post-delivery sample, 38 566 mean reads/cell for the  $\alpha\text{MHC-}$   
28  $\text{VEGF-B}$  post-delivery sample, 53 785 mean reads/cell for the WT MI sample, and 53 372  
29 mean reads/cell for the  $\alpha\text{MHC-VEGF-B}$  MI sample. Cellranger 3' RNAseq pipeline analysis of  
30 the sequencing data was run using 10x Genomics Cell Ranger v3.1.0 count and aggr  
31 pipelines. Reads were aligned against mouse genome mm10 (refdata-cellranger-mm10-  
32 3.0.0). Seurat v4.4.0 R package was used for quality control, filtering, and analysis of data.  
33 Filtering was performed based on number of detected genes, percentage of mitochondrial  
34 genes, and number of counts per gene. With the exception of cardiac TG SVF samples, all  
35 datasets were filtered to exclude cells with less than 500 or more than 4 000 detected genes,  
36 and cells with more than 5% of mitochondrial genes. Cardiac TG SVF filtering parameters  
37 were set to exclude cells with less than 500 or more than 6 000 detected genes, and cells with  
38 more than 10% of mitochondrial genes. Dataset gene normalization was performed using the  
39 "logNormalize" method on a log scale of 10 000. Cell cycle scores were calculated using the  
40 published scoring table of cell cycle genes<sup>10</sup>. The top 2 000 variably expressed genes were  
41 used for scaling of datasets. Clustering was performed at a resolution of 0.5 for all datasets,  
42 except TG SVF (0.8 resolution), and Uniform Manifold Approximation and Projection (UMAP)  
43 function was used to visualize the data in two-dimensional space<sup>11</sup>. Identification of the  
44 clusters was done using the "FindConservedMarkers" function, followed by sub-clustering to  
45 exclude damaged cells and contaminating cell populations. Within each analysis, the  
46 integrated dataset was downsampled to analyze equal number of cells: 8381 cells for TG  
47 VEGF-B-EC dataset, 6851 cells for TG-VEGF-B-SVF dataset, 9902 cells for the pregnancy

1 dataset, and 8902 cells for the MI dataset. For EC comparisons in the TG SVF dataset, we  
2 subsetted ECs from the original Seurat object followed by downsampling to 5385 to ensure  
3 equal number of ECs across all 3 groups. After downsampling, the “FindMarkers” function was  
4 used to determine differential gene expression (DEG) between defined samples using the  
5 default Wilcoxon rank-sum test. Annotation of the clusters was performed based on earlier  
6 publications<sup>12–15</sup> and the panglaoDB database<sup>16</sup>. A variety of Seurat-embedded functions and  
7 ggplot2-based functions were used to generate plots for data visualization. The “DimPlot()”  
8 function was used to plot UMAPs presented in the study. The “EnhancedVolcano” function  
9 was used to plot DEG comparing TG versus WT samples. For generation of heatmaps we  
10 used the “DoHeatmap()” function, while dot plots were generated using the “DotPlot()”  
11 function. Both “DoHeatmap()” and “DotPlot()” functions use the log-normalized and scaled  
12 data stored in the Seurat object in the slot named “scale.data”. For generation of violin plots  
13 and feature plots we used the “VlnPlot()” and “FeaturePlot()” functions, respectively. All  
14 sequencing datasets are available from the GEO database under accession number  
15 GSE261561.

16 **Gene deletion in adult mice.** Cre-mediated gene deletion was induced by giving oral gavage  
17 tamoxifen (Sigma-Aldrich) dissolved in corn oil to mice at a single daily dose of 2 mg for 5  
18 consecutive days.

19 ***In vivo* labelling of vasculature using *Lycopersicon esculentum* (Tomato) Lectin.** Mice  
20 were anesthetized using 50 µl i.p injection of 3:1 mixture of ketamine (50mg/ml) and xylazine  
21 (20mg/ml), followed by administration of 100 µg of fluorescent LE-lectin (#FL-1171-1, Vector  
22 labs) by tail vein injection. The LE-lectin was allowed to circulate for 10 min, after which the  
23 mouse was sacrificed, heart collected, OCT embedded, and sectioned.

24 **Lineage tracing and gene deletion in pups.** BmxCreER<sup>T2</sup>; Rosa26-tdTomato; αMHC-  
25 VEGF-B and BmxCreER<sup>T2</sup>; Rosa26-tdTomato littermate pups were injected on postnatal day  
26 1 (P1) or postnatal day 5 (P5) with 2.5 µl of 4-OH tamoxifen (#579002, Sigma-Aldrich, stock  
27 concentration = 25mg/ml) into the stomach (milk-line) to induce labelling for lineage tracing.  
28 The injections were administered twice with a 12 h interval. For gene deletion in BmxCreER<sup>T2</sup>;  
29 Rosa26-tdTomato; αMHC-VEGF-B; VEGFR-2<sup>fl/fl</sup> and BmxCreER<sup>T2</sup>; Rosa26-tdTomato;  
30 αMHC-VEGF-B; VEGFR-2<sup>wt/wt</sup> littermates, the pups were injected with 2.5 µl of 4-OH  
31 tamoxifen once a day at P1-P3.

32 **Use of adeno-associated viral vectors.** AAVs were produced as previously described<sup>17</sup>.  
33 Lab-generated AAV of serotype 9 (AAV9) encoding mVEGF-B<sub>167</sub>, mVEGF-B<sub>186</sub>, or having a  
34 scrambled control sequence downstream of CAG promoter was injected i.p. to adult mice at  
35 the dose of 2.2 x 10<sup>11</sup>, 6.6 x 10<sup>11</sup>, or 19.8 x 10<sup>11</sup> AAV9 particles and the recipient mice were  
36 analyzed at the timepoints mentioned in the results. For quantification of AAV9 in mouse  
37 tissues, DNA was extracted using Monarch Genomic DNA Purification Kit (#T3010L, New  
38 England BioLabs) and subjected to qPCR detection of the woodchuck posttranscriptional  
39 regulatory element (WPRE), with normalization to the lowest value (Intestine).

40 **5-Ethynyl-2’deoxyuridine (EdU) labeling.** EdU was dissolved in sterile PBS and  
41 administered i.p. to the mice at a total daily dose of 40 µg/g of body weight delivered in two  
42 separate doses/day at 12 h intervals, for three consecutive days prior to mouse sacrifice. EdU  
43 detection was performed on cardiac cryosections according to manufacturer’s instructions  
44 using Click-iT™ EdU Cell Proliferation Kit for Imaging (#C10337, C10339).

1 **Enzyme-linked immunosorbent assay (ELISA).** To measure mouse VEGF-B<sub>186</sub> levels in  
2 sera, ELISA was developed using R&D Systems proteins and antibodies<sup>1</sup>. The antibodies  
3 used for capture and detection, consecutively, were: mVEGF-B (1:250, #AF590) and  
4 biotinylated-mVEGF-B<sub>186</sub> (1:500, #BAF767). For preparation of standard curve, recombinant  
5 VEGF-B<sub>186</sub> protein (#767-VE/CF) was used at 25 ng/ml and seven 2-fold serial dilutions.  
6 Streptavidin-HRP (#890803, R&D Systems), and TMB (#T4444, Sigma) were used for signal  
7 detection and 1 M HCl to stop the reaction. Absorbance was measured at 450 nm.

8 **Randomization.** In AAV experiments, we used random-numbers table to assign groups. We  
9 ordered mice from Janvier mouse supplier that were age, weight and gender matched. Upon  
10 mouse arrival, the mice were assigned running numbers to give them mouse IDs. Mouse  
11 assignment to the mouse ID was randomly done. We used the running number to allocate the  
12 mice within an experimental AAV group, however, the AAV vector type assignment to the  
13 mouse group was done randomly. In experiments dealing with transgenic mice, we performed  
14 genotyping and allocated the mice to wildtype (WT) and transgenic (TG) groups. The  
15 allocation of experimental groups was performed randomly while taking in consideration the  
16 age and sex matching.

17 **Blinding.** Formulation of research plans and subsequent experiment documentation was  
18 performed by the first author and was supervised by the last author. Access to the research  
19 plans and experimental files revealing the allocated groups was provided to all authors and  
20 technicians who participated in data acquisition and analysis only after data acquisition and  
21 analysis was finalized. Throughout the whole study, all experimental analysis as  
22 quantifications and molecular analysis was performed blindly followed by assigning the  
23 obtained results from the analysis to the groups.

24 **Inclusion and exclusion criteria.** We set the initial criteria for inclusion and exclusion. In all  
25 experiments dealing with transgenic mice, we included age-matched wildtype (WT) littermates  
26 as the control group. We aimed to have matching numbers of mice in each experimental  
27 group. However, in the case that more mice were available from one group, we proceeded to  
28 include all the available mice. Mice that died because of the transgene or operation were not  
29 included in the analysis. In RT-qPCR, samples that showed to be outliers in terms of  
30 housekeeping genes expression were excluded from the analysis. Immunohistochemical  
31 stainings that failed initially and upon repetition were excluded from the quantifications  
32 analysis due to possible sample preparation problems. In lineage tracing experiments, mice  
33 that did not show expression of the reporter were excluded from the analysis. In gene deletion  
34 experiments, mice that did not show gene deletion were excluded from the analysis (most  
35 likely due to failure in tamoxifen administration). In AAV experiments, mice that did not show  
36 expression of the AAV-delivered gene at RNA and/or protein level in the target tissue, were  
37 excluded from the analysis. In some cases, we confirmed overexpression in the liver but could  
38 not confirm overexpression in the heart. In such case, we excluded heart from the analysis  
39 but still maintained the liver (Liver cells highly transfected by AAV).

## 40 **References**

- 41 1. Robciuc MR, Kivelä R, Williams IM, de Boer JF, van Dijk TH, Elamaa H, Tigistu-Sahle  
42 F, Molotkov D, Leppänen VM, Käkälä R, Eklund L, Wasserman DH, Groen AK, Alitalo  
43 K. VEGFB/VEGFR1-Induced Expansion of Adipose Vasculature Counteracts Obesity  
44 and Related Metabolic Complications. *Cell Metab.* 2016;23:712–724.
- 45 2. Bry M, Kivelä R, Holopainen T, Anisimov A, Tammela T, Soronen J, Silvola J, Saraste



- 1 A, Jeltsch M, Korpisalo P, Carmeliet P, Lemström KB, Shibuya M, Ylä-Herttuala S,  
2 Alhonen L, Mervaala E, Andersson LC, Knuuti J, Alitalo K. Vascular endothelial  
3 growth factor-B acts as a coronary growth factor in transgenic rats without inducing  
4 angiogenesis, vascular leak, or inflammation. *Circulation*. 2010;122:1725–1733.
- 5 3. Okabe K, Kobayashi S, Yamada T, Kurihara T, Tai-Nagara I, Miyamoto T,  
6 Mukouyama YS, Sato TN, Suda T, Ema M, Kubota Y. Neurons limit angiogenesis by  
7 titrating VEGF in retina. *Cell*. 2014;159:584–596.
- 8 4. Hiratsuka S, Minowa O, Kuno J, Noda T, Shibuya M. Flt-1 lacking the tyrosine kinase  
9 domain is sufficient for normal development and angiogenesis in mice. *Proc Natl Acad  
10 Sci U S A* [Internet]. 1998 [cited 2023 Dec 6];95:9349–9354.
- 11 5. Ambati BK, Nozaki M, Singh N, Takeda A, Jani PD, Suthar T, Albuquerque RJ,  
12 Richter E, Sakurai E, Newcomb MT, Kleinman ME, Caldwell RB, Lin Q, Ogura Y,  
13 Orecchia A, Samuelson DA, Agnew DW, St Leger J, Green WR, Mahasreshti PJ,  
14 Curiel DT, Kwan D, Marsh H, Ikeda S, Leiper LJ, Collinson JM, Bogdanovich S,  
15 Khurana TS, Shibuya M, Baldwin ME, Ferrara N, Gerber HP, De Falco S, Witta J,  
16 Baffi JZ, Raisler BJ, Ambati J. Corneal avascularity is due to soluble VEGF receptor-  
17 1. *Nature* [Internet]. 2006;443:993–997.
- 18 6. Hooper AT, Butler JM, Nolan DJ, Kranz A, Iida K, Kobayashi M, Kopp HG, Shido K,  
19 Petit I, Yanger K, James D, Witte L, Zhu Z, Wu Y, Pytowski B, Rosenwaks Z, Mittal V,  
20 Sato TN, Rafii S. Engraftment and reconstitution of hematopoiesis is dependent on  
21 VEGFR2-mediated regeneration of sinusoidal endothelial cells. *Cell Stem Cell*.  
22 2009;4:263–274.
- 23 7. Ehling M, Adams S, Benedito R, Adams RH. Notch controls retinal blood vessel  
24 maturation and quiescence. *Development* [Internet]. 2013 [cited 2023 Jun  
25 14];140:3051–3061.
- 26 8. Ramanujam D, Sassi Y, Lagerbauer B, Engelhardt S. Viral Vector-Based Targeting  
27 of miR-21 in Cardiac Nonmyocyte Cells Reduces Pathologic Remodeling of the Heart.  
28 *Mol Ther*. 2016;24:1939–1948.
- 29 9. Hemanthakumar KA, Fang S, Anisimov A, Mäyränpää MI, Mervaala E, Kivelä R.  
30 Cardiovascular disease risk factors induce mesenchymal features and senescence in  
31 mouse cardiac endothelial cells. *Elife*. 2021;10.
- 32 10. Kowalczyk MS, Tirosh I, Heckl D, Rao TN, Dixit A, Haas BJ, Schneider RK, Wagers  
33 AJ, Ebert BL, Regev A. Single-cell RNA-seq reveals changes in cell cycle and  
34 differentiation programs upon aging of hematopoietic stem cells. *Genome Res*.  
35 2015;25:1860–1872.
- 36 11. Becht E, McInnes L, Healy J, Dutertre CA, Kwok IWH, Ng LG, Ginhoux F, Newell EW.  
37 Dimensionality reduction for visualizing single-cell data using UMAP. *Nat Biotechnol*.  
38 2018;
- 39 12. Räsänen M, Sultan I, Paech J, Hemanthakumar KA, Yu W, He L, Tang J, Sun Y,  
40 Hlushchuk R, Huang X, Armstrong E, Khoma OZ, Mervaala E, Djonov V, Betsholtz C,  
41 Zhou B, Kivelä R, Alitalo K. VEGF-B Promotes Endocardium-Derived Coronary  
42 Vessel Development and Cardiac Regeneration. *Circulation*. 2020;
- 43 13. Karaman S, Paavonsalo S, Heinolainen K, Lackman MH, Ranta A, Hemanthakumar  
44 KA, Kubota Y, Alitalo K. Interplay of vascular endothelial growth factor receptors in  
45 organ-specific vessel maintenance. *J Exp Med*. 2022;219.
- 46 14. Kalucka J, de Rooij L, Goveia J, Rohlenova K, Dumas SJ, Meta E, Conchinha N V,  
47 Taverna F, Teuwen LA, Veys K, García-Caballero M, Khan S, Geldhof V, Sokol L,

- 1 Chen R, Treps L, Borri M, de Zeeuw P, Dubois C, Karakach TK, Falkenberg KD,  
 2 Parys M, Yin X, Vinckier S, Du Y, Fenton RA, Schoonjans L, Dewerchin M, Eelen G,  
 3 Thienpont B, Lin L, Bolund L, Li X, Luo Y, Carmeliet P. Single-Cell Transcriptome  
 4 Atlas of Murine Endothelial Cells. *Cell*. 2020;180:764-779.e20.
- 5 15. A single-cell transcriptomic atlas characterizes ageing tissues in the mouse. *Nature*.  
 6 2020;583:590–595.
- 7 16. Franzén O, Gan LM, Björkegren JLM. PanglaoDB: a web server for exploration of  
 8 mouse and human single-cell RNA sequencing data. *Database J Biol Databases*  
 9 *Curation* [Internet]. 2019 [cited 2024 Mar 5];2019:46.
- 10 17. Anisimov A, Alitalo A, Korpisalo P, Soronen J, Kaijalainen S, Leppänen VM, Jeltsch  
 11 M, Ylä-Herttua S, Alitalo K. Activated forms of VEGF-C and VEGF-D provide  
 12 improved vascular function in skeletal muscle. *Circ Res*. 2009;104:1302–1312.

13

#### 14 Supplemental figure legends

15 **Supplemental figure 1. (A)** Gating and sorting strategy for isolation of cardiac fibroblasts  
 16 (CFs) and endothelial cells (ECs) using flow cytometry. Hearts of WT and aP2-VEGF-B mice  
 17 were proteolytically digested, myocytes were discarded, and the entire non-myocyte cell  
 18 suspension was stained with fluorophore-conjugated antibodies against the marked epitopes:  
 19 Cd45 (leukocytes), Cd105 (ECs) and PDGFR $\alpha$  (CFs and pericytes). **(B)** Flow cytometry  
 20 charts. The first gate for live cells was based on FSC-Area/SSC-Area (left), followed by a gate  
 21 for non-leukocytes based on SSC-height and Cd45 (middle). Subsequent single cell gates  
 22 were for CFs (Cd45-Cd105- PDGFR $\alpha$ +) and ECs (Cd45-Cd105+PDGFR $\alpha$ -).

23 **Supplemental figure 2. (A)** Concentration of mVEGF-B<sub>186</sub> (ng/ml) in sera from adult aP2-  
 24 VEGF-B,  $\alpha$ MHC-VEGF-B and WT mice (n= 3). Note that the  $\alpha$ MHC-VEGF-B mice express  
 25 human VEGF-B transgene, while the ELISA detects only the mouse VEGF-B<sub>186</sub>. \*P, Kruskal-  
 26 Wallis ANOVA test with Dunn's correction. **(B)** Comparison of the weights of tissues isolated  
 27 from adult aP2-VEGF-B mice and their WT littermates (n= 4-6). Spleens and kidneys were  
 28 weighed from a separate experiment. \*P, unpaired Mann Whitney t-test. **(C, D)** Representative  
 29 immunohistochemical stainings of Cd31 and dystrophin in heart cryosections from adult aP2-  
 30 VEGF-B mice and their WT littermates (n= 9 WT, 7 aP2). Note the increased vessel area  
 31 fraction (%) and increased CMC size ( $\mu\text{m}^2$ ) measured from the mid-myocardium. Scale bars  
 32 50  $\mu\text{m}$ . \*P, unpaired two-tailed t-test with Welch correction. **(E)** Percentages of aP2-VEGF-B  
 33 mice obtained from WT/WT to WT/aP2 matings at E18, P0, and in 4-weeks old mice, and  
 34 those obtained from 4-weeks old mice from WT/WT to WT/ $\alpha$ MHC matings. **(F)** Heart weight  
 35 to body weight ratio at the indicated postnatal days in aP2-VEGF-B and  $\alpha$ MHC-VEGF-B pups  
 36 versus their WT littermates (For aP2 weights; n= 4 WT\_P0, 3 aP2\_P0, 8 WT\_P7, 3 aP2\_P7,  
 37 3 WT\_P14, 5 aP2\_P14, 3 WT\_P28, 3 aP2\_P28, For  $\alpha$ MHC weights; 4 WT\_P0, 4  $\alpha$ MHC\_P0,  
 38 3WT\_P7, 5  $\alpha$ MHC\_P7, 4WT\_P14, 3  $\alpha$ MHC\_P14, 3 WT\_P28, 3  $\alpha$ MHC\_P28). \*P, unpaired  
 39 Mann Whitney t-test. **(G)** Representative cardiac MRI images of adult aP2-VEGF-B mice and  
 40 their WT littermates. **(H)** ECG values of aP2-VEGF-B and WT littermate mice (n= 6 WT, 4  
 41 aP2). Values are represented as means  $\pm$  SD. \*P, unpaired Mann Whitney t-test.

42 **Supplemental figure 3. (A, B)** Representative images from cardiac *ex vivo*  $\mu$ CT scanning of  
 43 dead aP2-VEGF-B pups and surviving WT littermates at P0. Yellow arrows point to septal  
 44 defects. Scale bars 1mm.

1 **Supplemental figure 4. (A)** A heatmap showing the expression levels of cell identity transcript  
2 markers used to annotate cell clusters in the VEGF-B TG mice. The red box indicates some  
3 of the VEGFB-iECs markers. The heatmap was generated using the Seurat-embedded  
4 function “DoHeatmap()”. The average expression is plotted using log-normalized and scaled  
5 data stored in the Seurat object under the slot “scale.data”. **(B)** Bar plot showing comparison  
6 of the percentage of each cell population across samples from aP2-VEGF-B,  $\alpha$ MHC-VEGF-B  
7 and WT mice. **(C)** Violin plots showing overlaid expression of VEGFB-iECs markers in the  
8 aP2-VEGF-B,  $\alpha$ MHC-VEGF-B and WT samples. The single-cell datasets were generated  
9 through pooling of 3 hearts into 1 sample per group.

10 **Supplemental figure 5. (A)** UMAP plot showing clusters from Seurat integrated analysis of  
11 cardiac stromovascular fractions from aP2-VEGF-B,  $\alpha$ MHC-VEGF-B, and WT littermate mice.  
12 **(B)** A heatmap showing the expression levels of marker transcripts used to annotate the cell  
13 clusters. The heatmap was generated using the “DoHeatmap()” function embedded in Seurat  
14 package. The average expression was plotted using log-normalized and scaled data stored in  
15 the Seurat object under the slot “scale.data”. Gene expression is presented as an average per  
16 cluster. **(C)** Bar plot showing comparison of the percentages of each cell population across  
17 the samples. **(D)** Violin plots showing overlaid expression of selected VEGFB-iEC marker  
18 transcripts in the ECs from aP2-VEGF-B,  $\alpha$ MHC-VEGF-B and WT hearts. Note that the ECs  
19 were downsampled to have an equal number of ECs per genotype in the comparison. **(E)**  
20 Volcano plots showing the highest DEGs across all cardiac fibroblasts (CFs) from aP2-VEGF-  
21 B mice versus WT mice or  $\alpha$ MHC-VEGF-B mice versus WT mice, respectively. Volcano plots  
22 present the values obtained from Seurat integrated DEG analysis, where avg log<sub>2</sub>FC is  
23 presented on x-axis and log<sub>10</sub> adjusted P-value is presented on y axis. The p-value was  
24 adjusted based on Bonferroni correction using all features in the dataset. Single-cell dataset  
25 was performed through pooling of 2 hearts per genotype and subsequently ran as 1 sample  
26 per genotype. Please note that VEGFB-iECs do not cluster separately due to presence of  
27 other cell types and the set clustering resolution value, which resulted in the clustering of  
28 VEGFB-iECs with capillary ECs.

29 **Supplemental figure 6.** Representative immunohistochemical stainings of podocalyxin and  
30 Cd45 **(A)** or Cd206 **(B)** in cardiac sections from adult aP2-VEGF-B,  $\alpha$ MHC-VEGF-B, and WT  
31 littermate mice (n= 3-4), and the corresponding quantifications. \*P, Kruskal-Wallis ANOVA test  
32 with Dunn’s correction. Scale bar 20 $\mu$ m. Quantification of inflammation markers **(C)** and  
33 cardiac stress markers **(D)** from heart lysates of aP2-VEGF-B,  $\alpha$ MHC-VEGF-B, and WT adult  
34 littermate mice by RT-qPCR (n= 6 WT, 5 aP2, 6  $\alpha$ MHC). \*P, Kruskal-Wallis ANOVA test with  
35 Dunn’s correction.

36 **Supplemental figure 7. (A)** Representative immunohistochemical staining of Cd24 and  
37 podocalyxin in thick vibratome sections showing the sub-endocardial region of aP2-VEGF-B,  
38  $\alpha$ MHC-VEGF-B and WT mice. Scale bars 10  $\mu$ m. Yellow arrows point to Plvap and Cd24  
39 positive ECs, while red arrows point to Cd24-positive cells within the vascular lumen which  
40 escaped vascular PBS perfusion. **(B)** Quantifications of Plvap-podocalyxin double positive  
41 vessels (n= 3), and Cd24-podocalyxin double positive vessels (n= 3 WT, 4 aP2, 5  $\alpha$ MHC) in  
42 sub-endocardial, mid-myocardial, and sub-epicardial regions of the heart. \*P, Kruskal-Wallis  
43 ANOVA test. **(C)** Quantifications of vessel lumen areas in the sub-endocardial, mid-  
44 myocardial, and sub-epicardial regions of the heart from aP2-VEGF-B,  $\alpha$ MHC-VEGF-B and  
45 WT mice, using podocalyxin staining (n= 3 WT, 7 aP2, 10  $\alpha$ MHC). \*P, Kruskal-Wallis ANOVA  
46 test.

1 **Supplemental figure 8. (A)** Representative immunohistochemical staining of Col13a1, Plvap,  
 2 and podocalyxin in the sub-endocardial region of WT and VEGF-B TG hearts. Scale bars 50  
 3  $\mu\text{m}$ . **(B)** Representative images of Plvap-stained heart sections from  $\alpha\text{MHC-VEGF-B}$  and WT  
 4 littermate mice that were perfused with fluorescent LE-lectin. Scale bars 50  $\mu\text{m}$ .

5 **Supplemental figure 9. (A)** Merged feature plots from Seurat integrated analysis of aP2-  
 6 VEGF-B,  $\alpha\text{MHC-VEGF-B}$  and WT FAC-sorted cardiac ECs, showing cells expressing the  
 7 capillary marker *Car4*, arterial marker *Gja4*, and venous marker *Nr2f2*. **(B)** Representative  
 8 immunohistochemical stainings of Plvap and podocalyxin with SMA, or Nr2f2 (Coup-tfII), in  
 9 heart cryosections of adult aP2-VEGF-B,  $\alpha\text{MHC-VEGF-B}$  and WT mice. Scale bars 50  $\mu\text{m}$ .  
 10 **(C)** Quantification of relative amounts of VEGFB-iECs markers from aP2-VEGF-B,  $\alpha\text{MHC-}$   
 11 VEGF-B and WT tissue lysates by RT-qPCR (n= 4 WT, 3 aP2, 4  $\alpha\text{MHC}$ ). \*P, Kruskal-Wallis  
 12 ANOVA test with Dunn's correction.

13 **Supplemental figure 10. (A)** Representative immunohistochemical stainings of Dll4, SMA,  
 14 and Plvap in cardiac cryosections from adult aP2-VEGF-B,  $\alpha\text{MHC-VEGF-B}$  and WT mice.  
 15 Scale bars 50  $\mu\text{m}$ . **(B)** Representative immunohistochemical staining of Vegfr-2 and Cd31 in  
 16 cardiac cryosections from P1  $\alpha\text{MHC-VEGF-B}$  pups and their WT littermates. Scale bars 20  
 17  $\mu\text{m}$ . Note magenta arrows pointing to VEGFR-2 positive segments of the endocardial cell  
 18 layer. **(C)** Violin plot showing expression of *Kdr* in the scRNA seq dataset obtained from FAC-  
 19 sorted cardiac ECs isolated from adult aP2-VEGF-B,  $\alpha\text{MHC-VEGF-B}$  and WT mice. The  
 20 single-cell datasets were generated through pooling of 3 hearts into 1 sample per group. **(D)**  
 21 Representative immunohistochemical staining of Vegfr-2 and Cd31 in cardiac cryosections  
 22 from adult WT hearts. Scale bars 20  $\mu\text{m}$ . Note magenta arrows pointing to VEGFR-2 positive  
 23 segments of the endocardial cell layer.

24 **Supplemental figure 11.** Representative immunohistochemical stainings of Plvap and RFP  
 25 in 200  $\mu\text{m}$  thick cardiac sections from 4-6 weeks old *BmxCreER<sup>T2</sup>*; *Rosa26-tdTomato*;  $\alpha\text{MHC-}$   
 26 VEGF-B; VEGFR-2<sup>fl/fl</sup> mice and their *BmxCreER<sup>T2</sup>*; *Rosa26-tdTomato*;  $\alpha\text{MHC-VEGF-B}$ ;  
 27 VEGFR-2<sup>wt/wt</sup> littermates that were administered tamoxifen on postnatal days P1-P3. Scale bar  
 28 100 $\mu\text{m}$ .

29 **Supplemental figure 12. (A)** A table showing the numbers of LAD operated and survived  
 30 aP2-VEGF-B,  $\alpha\text{MHC-VEGF-B}$  and WT littermate mice. **(B)** Quantification of mVEGF-B<sub>167</sub> and  
 31 mVEGF-B<sub>186</sub> transcripts from heart lysates (n= 6) and sorted cardiac ECs (n= 2) of aP2-VEGF-  
 32 B and WT littermate mice by RT-qPCR. \*P, unpaired two-tailed t-test with Welch correction for  
 33 heart lysate mVEGF-B<sub>167</sub> and \*P, unpaired Mann Whitney t-test for the rest. **(C)** Agarose gel  
 34 electrophoresis of both mouse and human VEGF-B<sub>167</sub> and VEGF-B<sub>186</sub> PCR products using  
 35 heart lysate cDNA and primers that bind to VEGF-B exon 3 and exon 7 sequences. Numbers  
 36 indicate isoform intensity signal normalized to the total signal from both isoforms. Note that  
 37 the mVEGF-B<sub>186</sub> primers also recognize the human VEGF-B<sub>186</sub> isoform. **(D)** WB of plasma  
 38 mVEGF-B from mice after 1 week treatment with AAV9-mVEGF-B<sub>167</sub>, AAV9-mVEGF-B<sub>186</sub> and  
 39 AAV9-scrambled control. **(E)** WB detection of 10 ng of both VEGF-B<sub>167</sub> and VEGF-B<sub>186</sub>  
 40 recombinant polypeptides using the mVEGF-B antibody. **(F)** Schematic of the AAV9 VEGF-B  
 41 experiment, and RT-qPCR of AAV9 vectors (WPRE) in tissue lysates containing both genomic  
 42 DNA and episomal DNA (n= 4). **(G)** RT-qPCR of mouse VEGF-B isoforms in the indicated  
 43 tissue lysates after 1 (n= 3), 2 (n= 3-4), and 4 (n= 2-4 for hearts, 4 for livers) weeks of treatment  
 44 with the indicated AAV9s. \*P, Kruskal-Wallis ANOVA test. **(H)** WB and quantifications of

1 mVEGF-B from heart lysates of mice treated with the indicated AAV9s at the indicated  
2 timepoints.

3 **Supplemental figure 13. (A)** Representative images showing detected EdU and  
4 immunohistochemical staining of podocalyxin in the sub-endocardium after 1, 2, and 4 weeks  
5 of treatment with AAV9 encoding the indicated VEGF-B isoforms. Scale bars 20  $\mu$ m. **(B)**  
6 Quantification of EdU positive endothelial nuclei masked by vascular staining from the  
7 indicated heart regions in mice treated with the AAVs at 1 (n= 3), 2 (n= 3-4), and 4 (n= 2-4)  
8 weeks post AAV administration. \*P, Kruskal-Wallis ANOVA test. **(C)** HW/BW analysis of mice  
9 treated with the AAVs. \*P, Kruskal-Wallis ANOVA test. **(D)** Cardiac ejection fraction  
10 percentage obtained from echocardiography analysis of mice before the AAV administration  
11 and at 1 and 4 weeks after administration (n= 4). \*P, two-way ANOVA with Dunnett's  
12 correction.

13 **Supplemental figure 14. (A)** Western blots of the indicated polypeptides and **(B)** signal  
14 quantification from heart lysates of WT mice treated with AAV9 encoding VEGF-B<sub>186</sub>, VEGF-  
15 B<sub>167</sub>, or a scrambled control for two weeks (n= 4). \*P, Kruskal-Wallis ANOVA test.

16 **Supplemental figure 15** Quantification of VEGFB-iECs marker transcripts from mice treated  
17 with AAVs encoding the indicated VEGF-B isoform in comparison to a scrambled control at 1  
18 (n= 3) **(A)**, 2 (n= 3-4) **(B)**, and 4 (n= 2-4) **(C)** weeks (\*P, Kruskal-Wallis ANOVA test), and from  
19 Cdh5-CreER<sup>T2</sup>; VEGFR-1<sup>fl/fl</sup> mice two weeks after VEGFR-1 deletion **(D)** (n= 3 VEGFR-1<sup>fl/fl</sup>  
20 Cre-, 8 VEGFR-1<sup>fl/fl</sup> Cre+, \*P, unpaired Mann Whitney t-test), plus **(E)** from mice lacking the  
21 VEGFR-1 tyrosine kinase domain (n= 3 VEGFR-1 TK<sup>wt/wt</sup>, 4 VEGFR-1 TK<sup>-/-</sup>, \*P, unpaired Mann  
22 Whitney t-test).

23 **Supplemental figure 16. (A)** Representative immunohistochemical stainings of podocalyxin  
24 and Plvap in cardiac cryosections of adult WT mice treated with  $19.8 \times 10^{11}$  vp of AAV9-VEGF-  
25 B<sub>186</sub> versus AAV9-scrambled control for two weeks. Scale bars 100 $\mu$ m. Note that the magenta  
26 arrows point to the small expanded population of VEGFB-iECs. **(B)** Experimental timeline of  
27 Cdh5-CreER<sup>T2</sup> mediated deletion of VEGFR-2 and administration of AAV9 encoding VEGF-  
28 B<sub>186</sub> or the scramble control vector. **(C)** HW/BW analysis of mice with or without EC deletion  
29 of VEGFR-2 and treated with the indicated AAVs (n= 6 AAV-Scrambled + VEGFR-2<sup>fl/fl</sup> Cre-, 3  
30 AAV-VEGF-B<sub>186</sub> + VEGFR-2<sup>fl/fl</sup> Cre-, 4-5 AAV-VEGF-B<sub>186</sub> + VEGFR-2<sup>fl/fl</sup> Cre+). \*P, unpaired  
31 Mann Whitney t-test. **(D)** Quantification of VEGFB-iEC marker transcripts from the groups  
32 analyzed in **(B)**. \*P, Kruskal-Wallis ANOVA test.

### 33 **Supplemental tables**

34 **Supplemental table 1.** Echocardiography parameters from adult  $\alpha$ MHC-VEGF-B and WT  
35 littermate mice 2 days after LAD ligation (n= 4 WT, 3  $\alpha$ MHC). For each genotype, echo  
36 parameters measured at two days post-MI were compared to the basal level values. Values  
37 are represented as means  $\pm$  SD. \*P for values that passed normality testing, two-way ANOVA  
38 (Fischer's LSD test). \*P for values that did not pass normality testing, Wilcoxon matched-pairs  
39 signed rank test using Holm-Šidák method. Annotating with (,s) refers to end-systole, while  
40 (,d) refers to end-diastole. Thickness of the intraventricular septum (IVS), thickness of the left  
41 ventricle posterior wall (LVPW), left ventricular mass (LV mass), left ventricular volume (LV  
42 vol), left ventricular internal diameter (LVID), ejection fraction (EF), and fractional shortening  
43 (FS).

- 1 **Supplemental table 2.** Echocardiography parameters from WT mice treated with AAV9s  
2 encoding either of the two VEGF-B isoforms in comparison to a scrambled control at 1- and  
3 4-weeks after AAV administration (n= 4). Within each treatment, echo parameters of 1 week  
4 and 4 weeks were compared to the basal level values. \*P, two-way ANOVA with Dunnett's  
5 correction. Annotating with (,s) refers to end-systole, while (,d) refers to end-diastole.  
6 Thickness of the intraventricular septum (IVS), thickness of the left ventricle posterior wall  
7 (LVPW), left ventricular mass (LV mass), left ventricular volume (LV vol), left ventricular  
8 internal diameter (LVID), ejection fraction (EF), and fractional shortening (FS).
- 9 **Supplemental table 3.** Summary of the statistical tests used in the experiments presented in  
10 the main and supplemental figures.
- 11 **Supplemental table 4.** List of oligo-primers used for qPCR and PCR.

**A**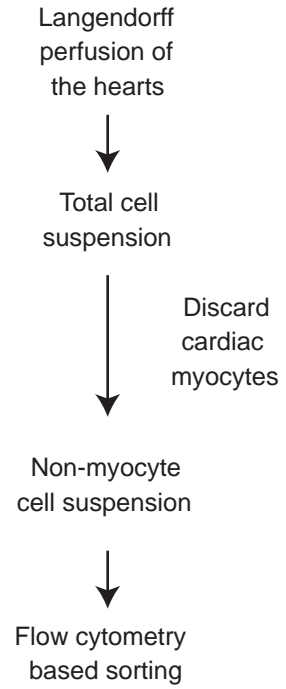**B**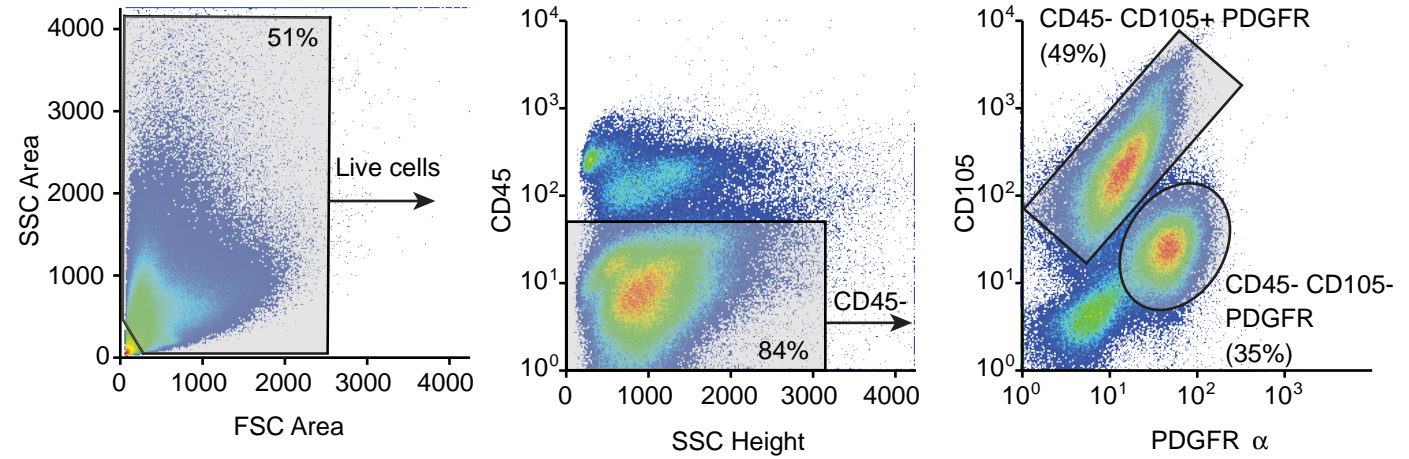**Supplemental figure 1**

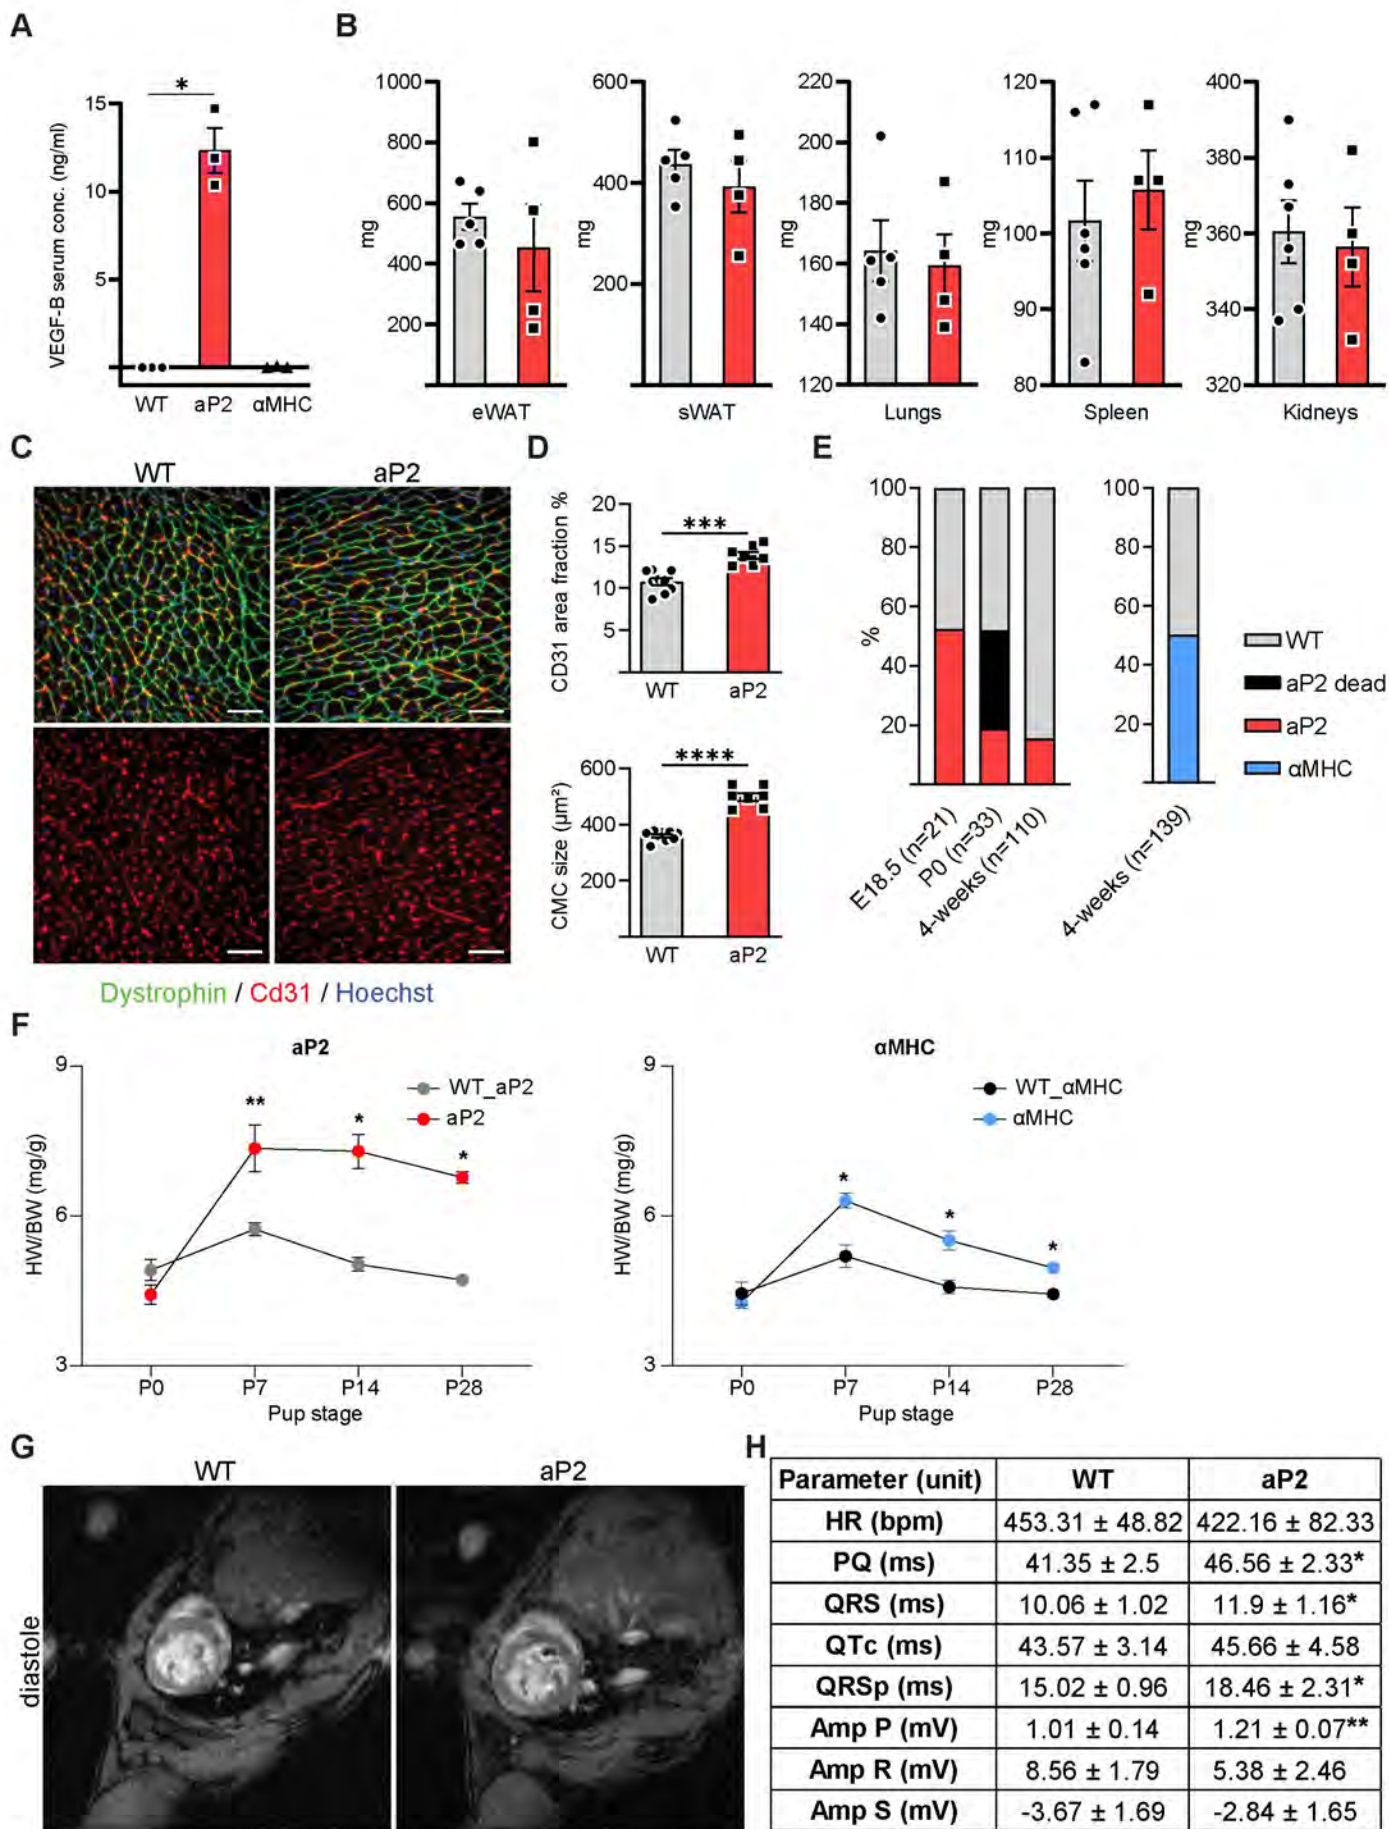

Supplemental figure 2



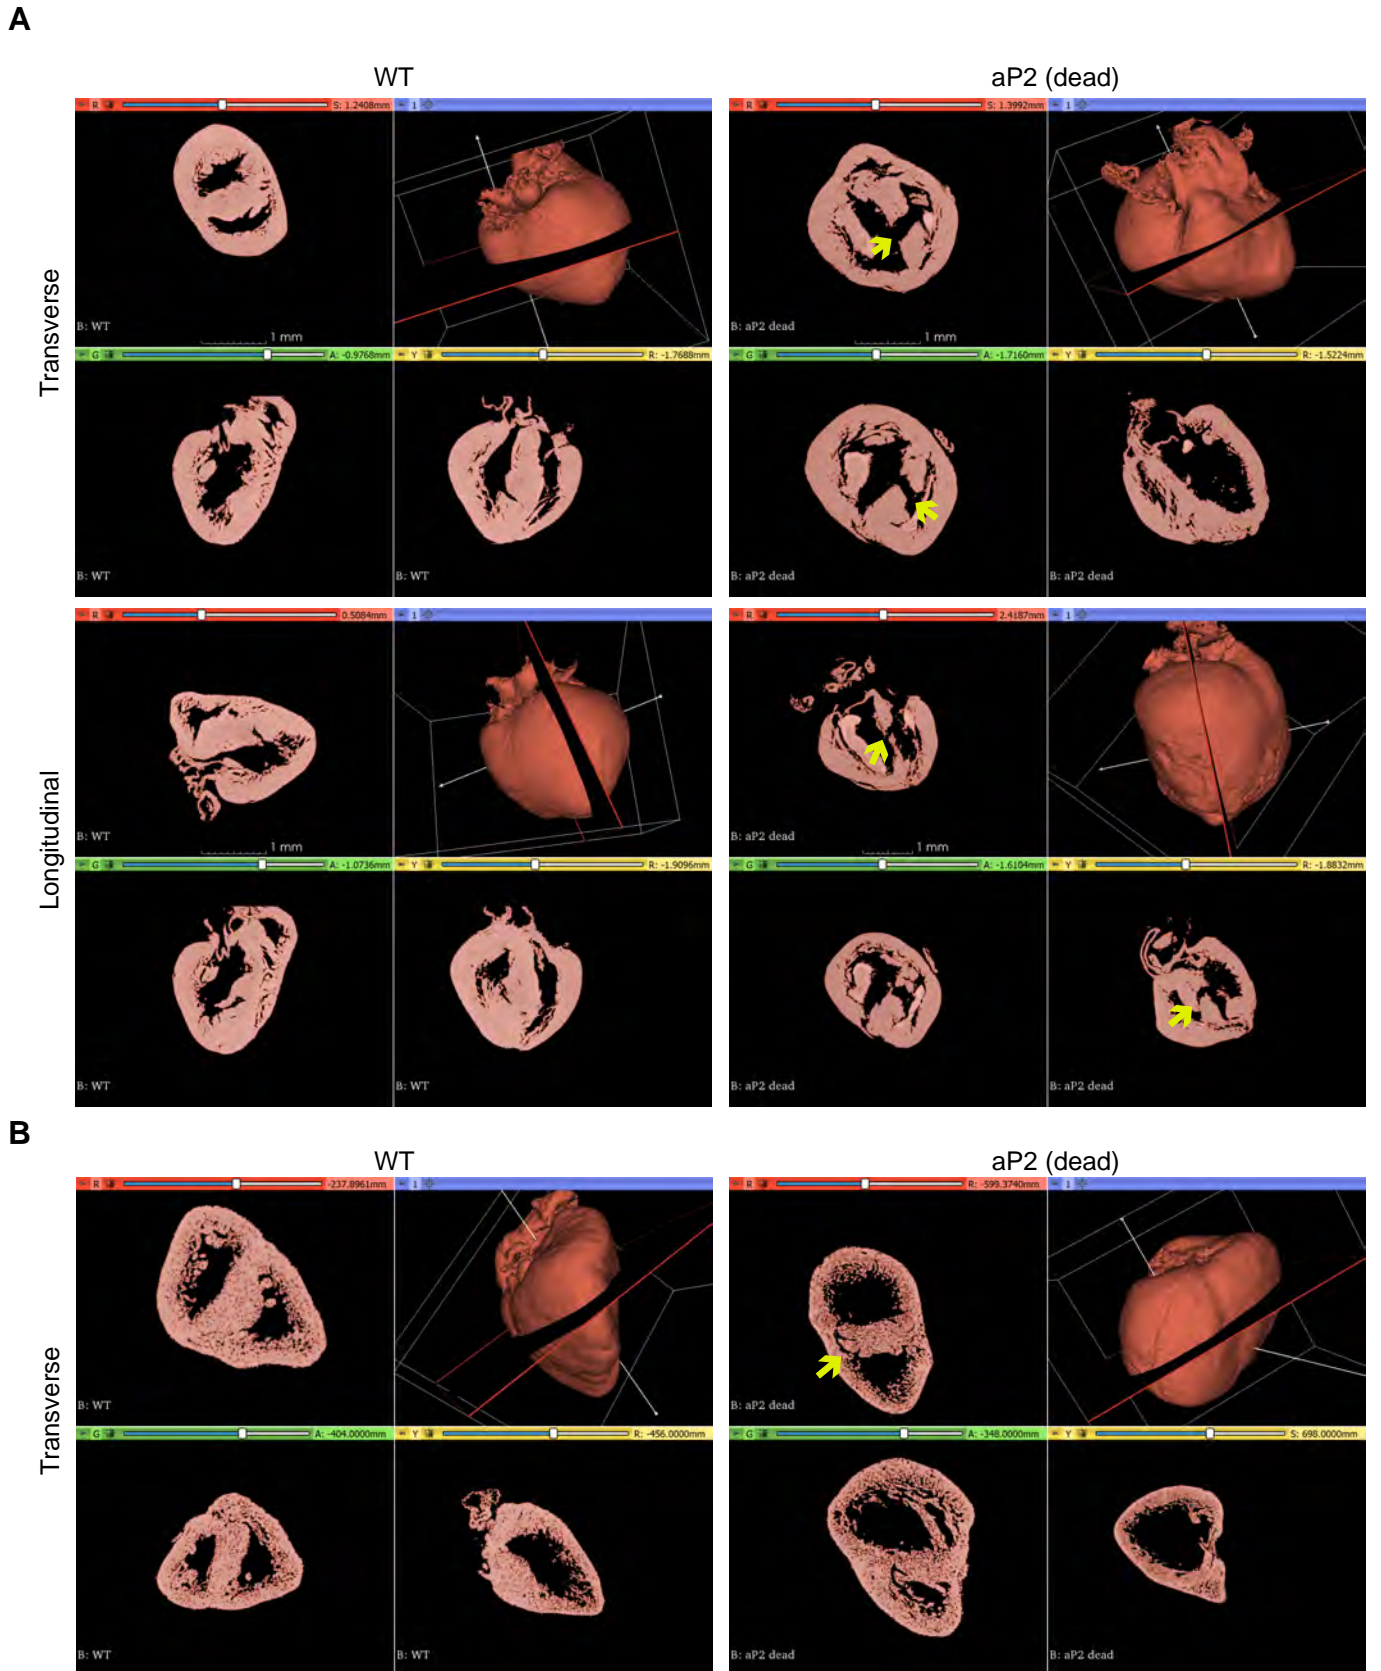

Supplemental figure 3

**A**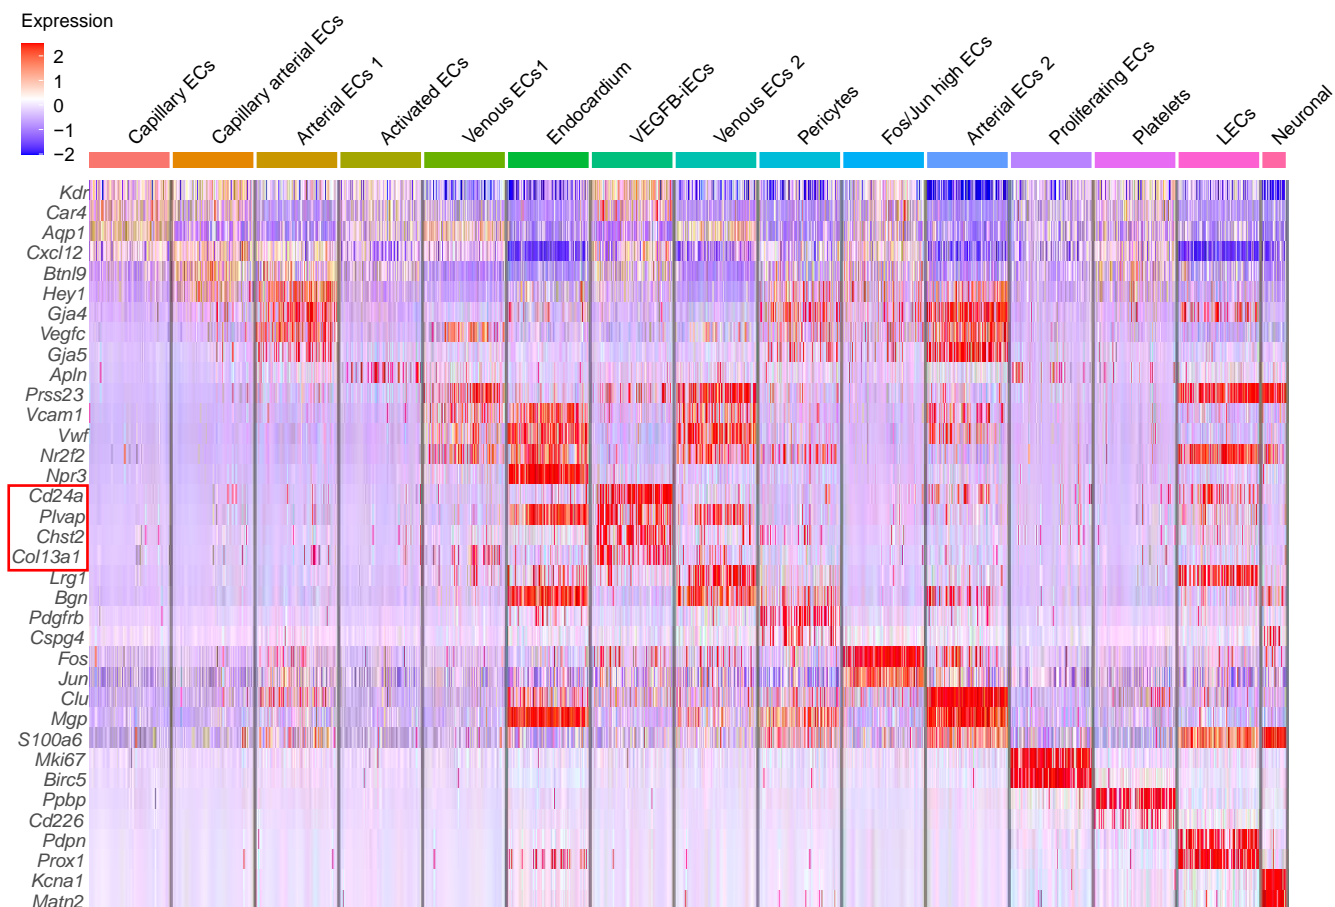**B**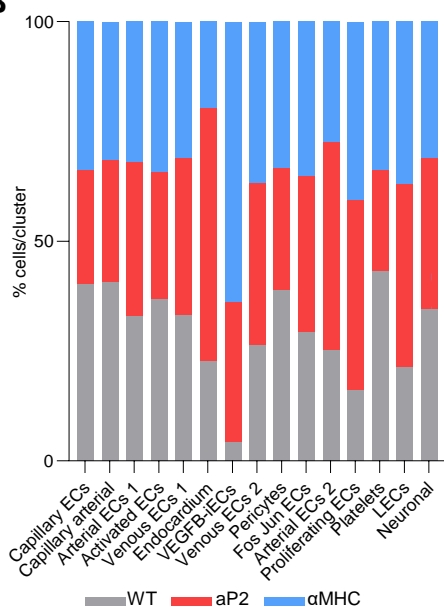**C**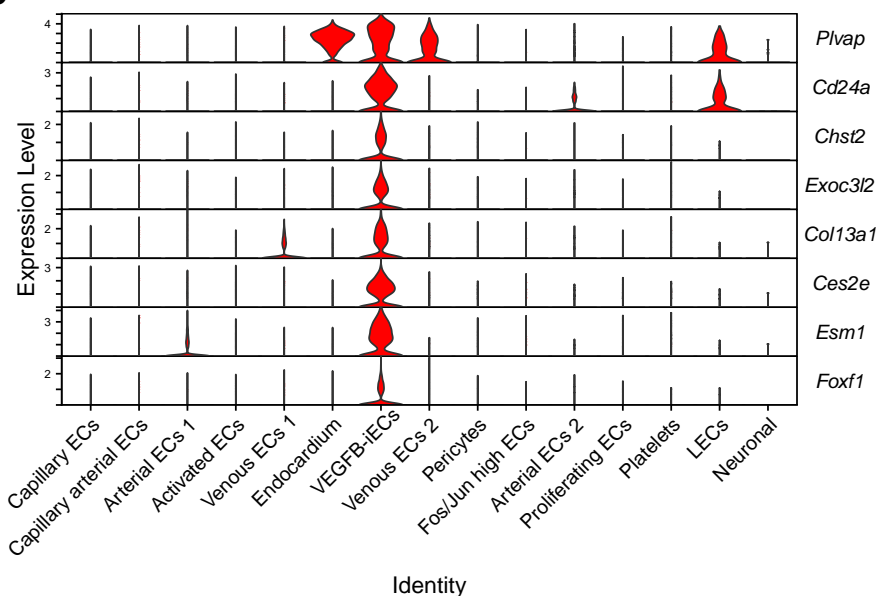

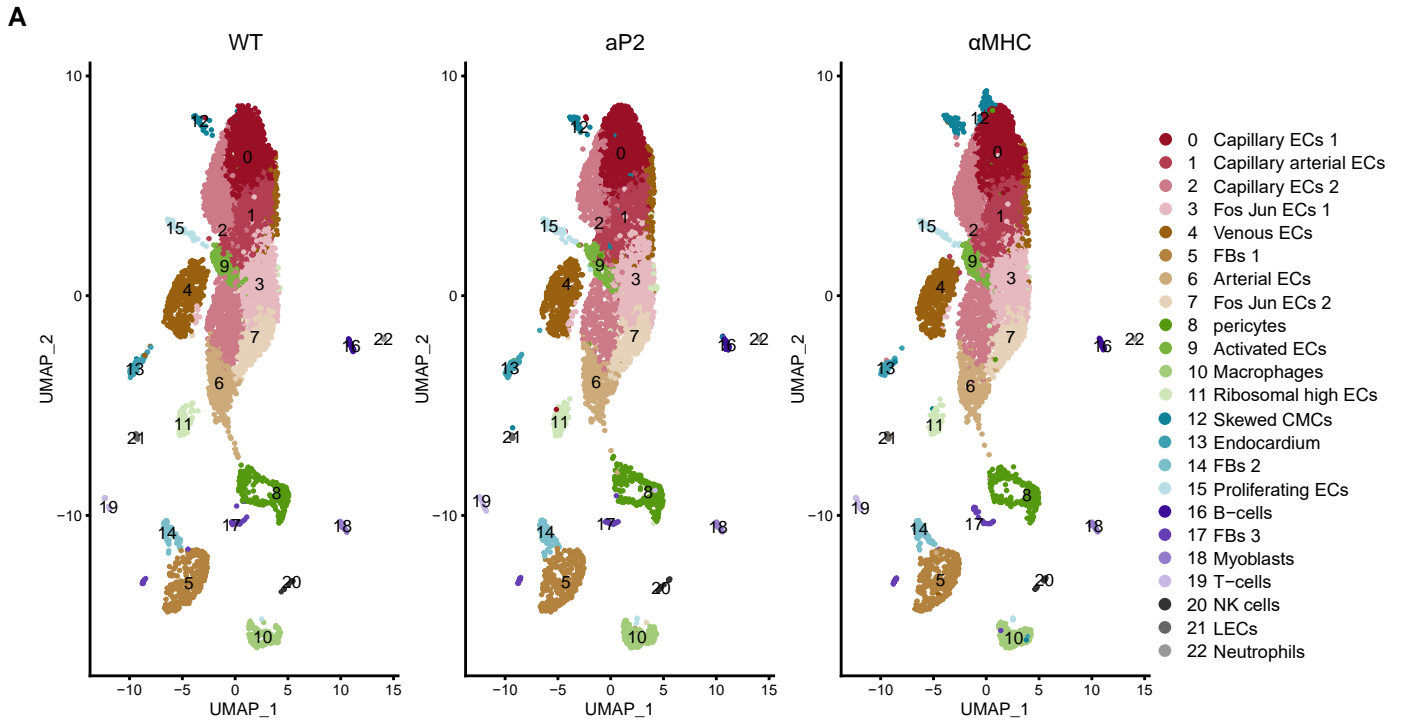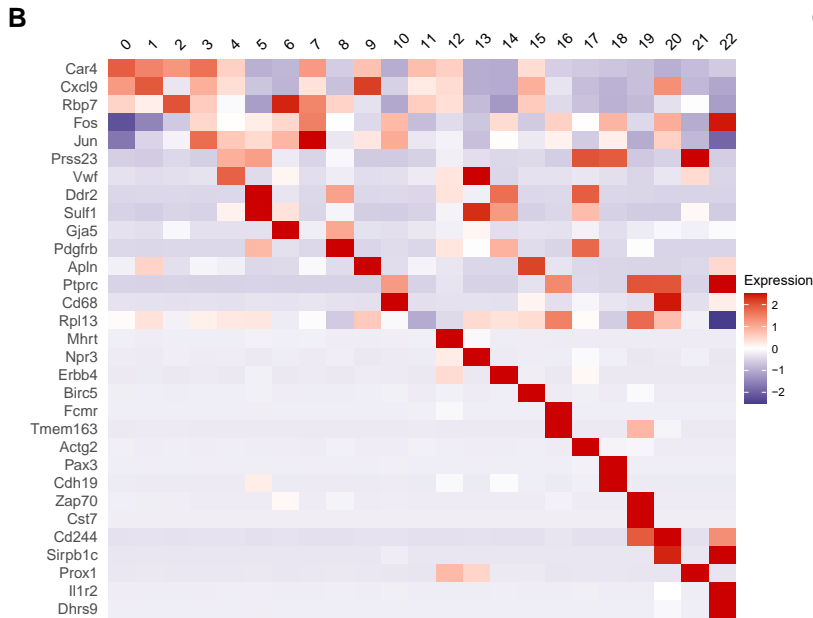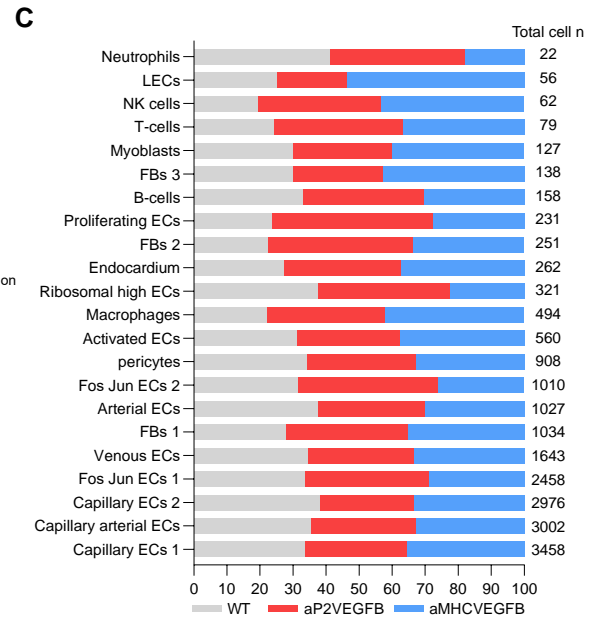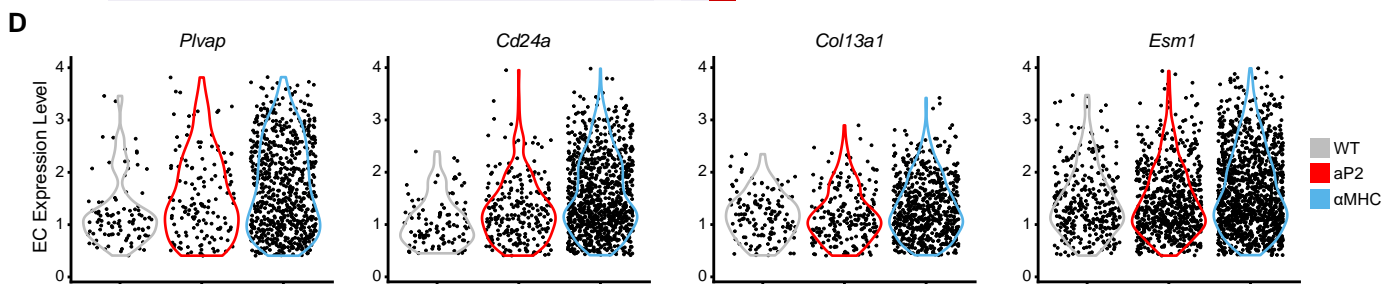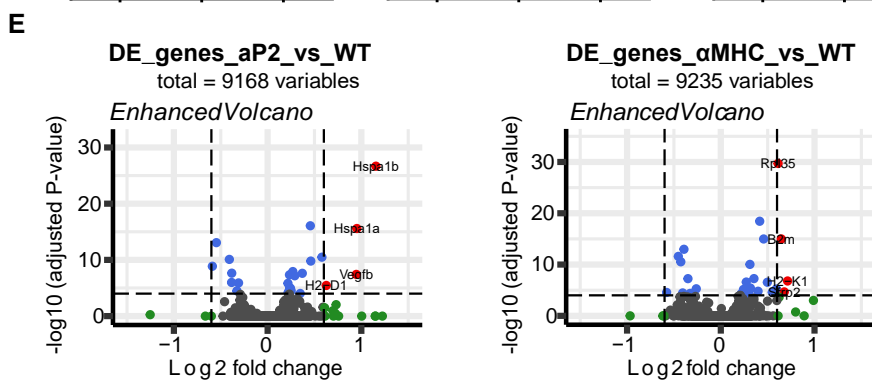

Supplemental figure 5

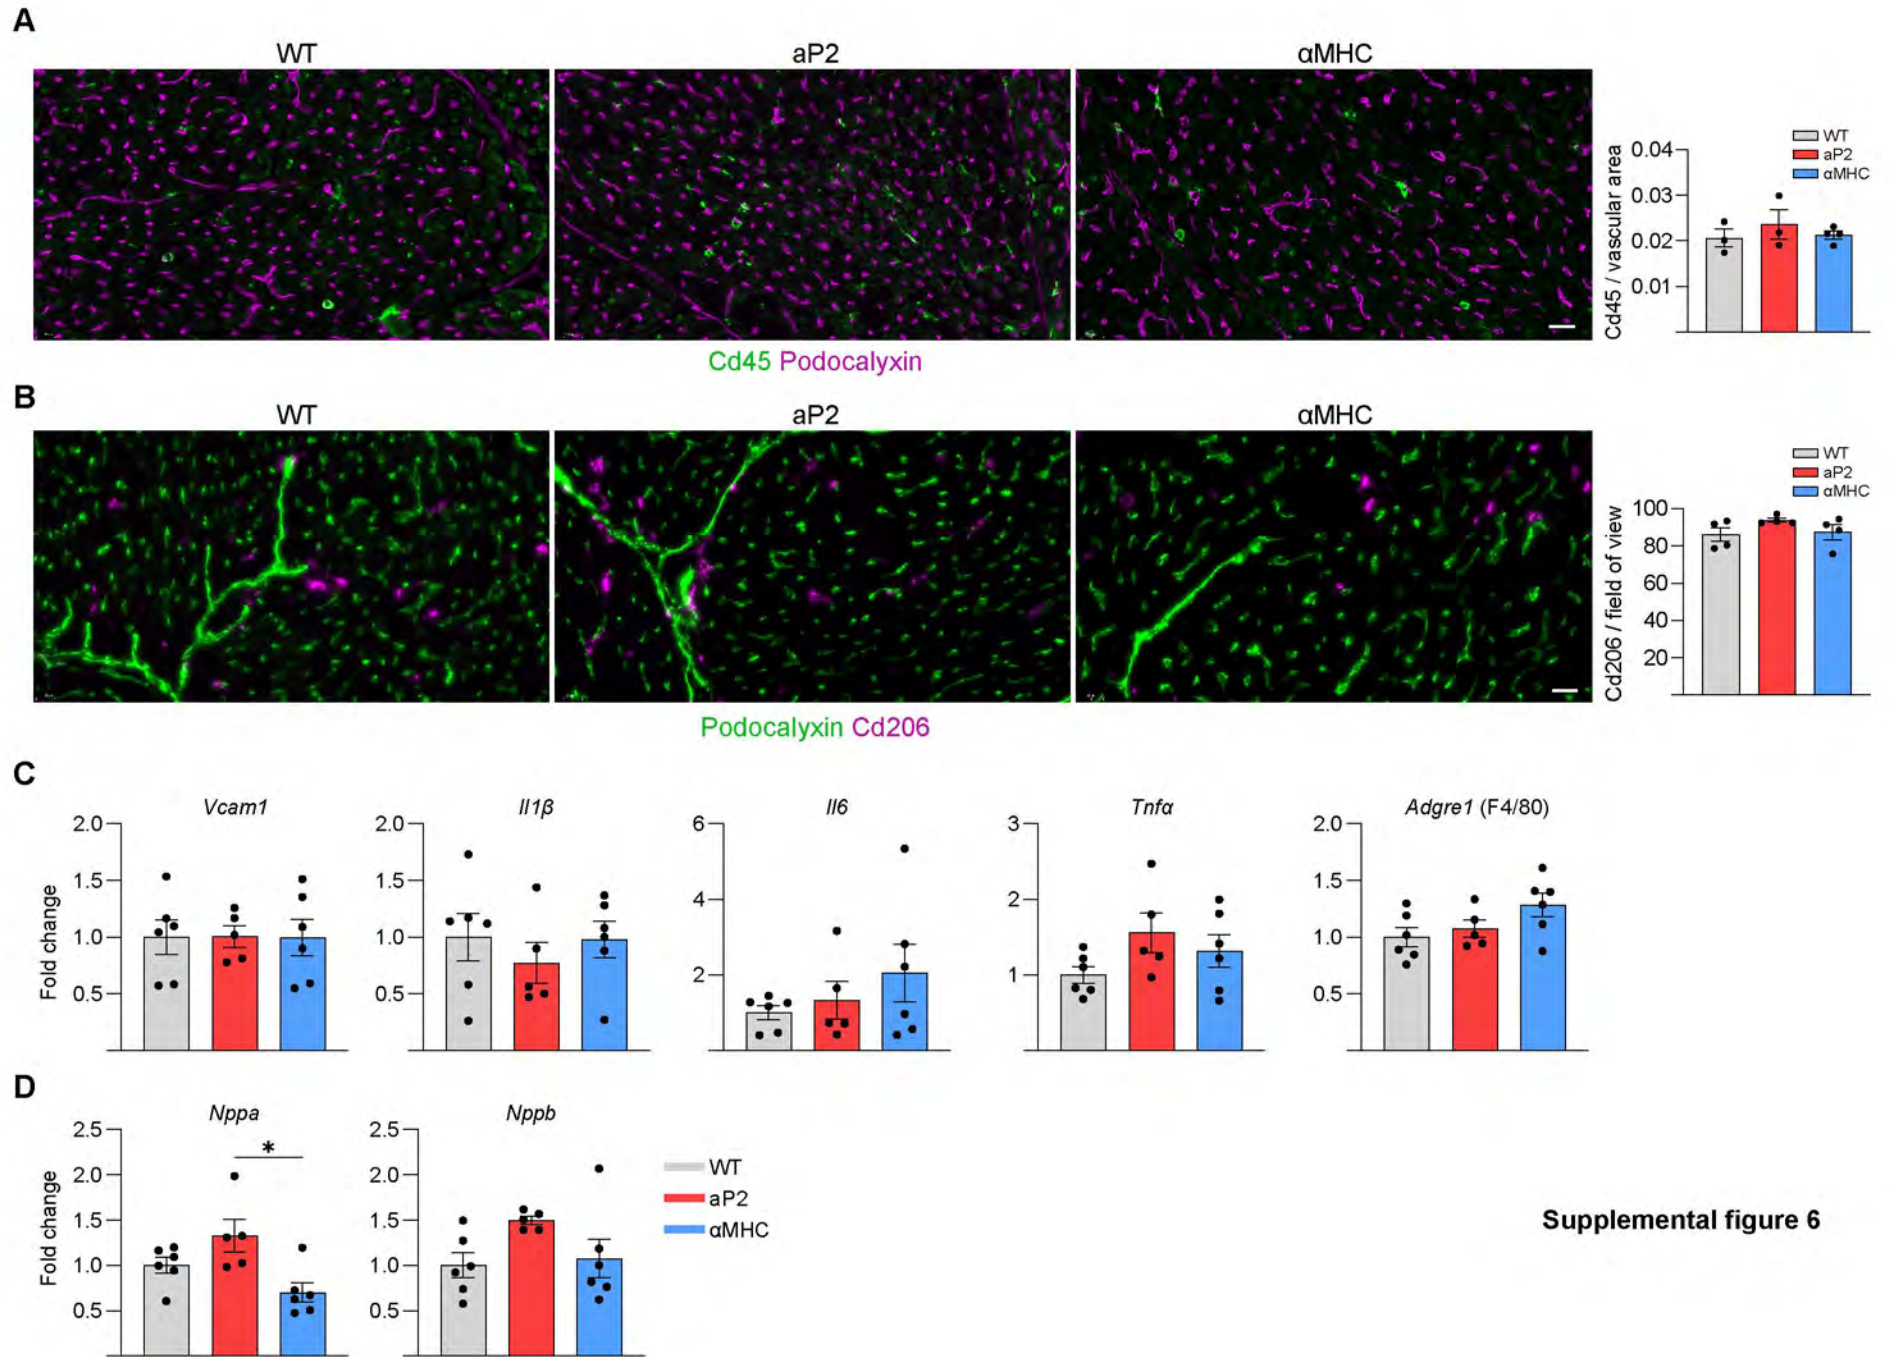

Supplemental figure 6

**A**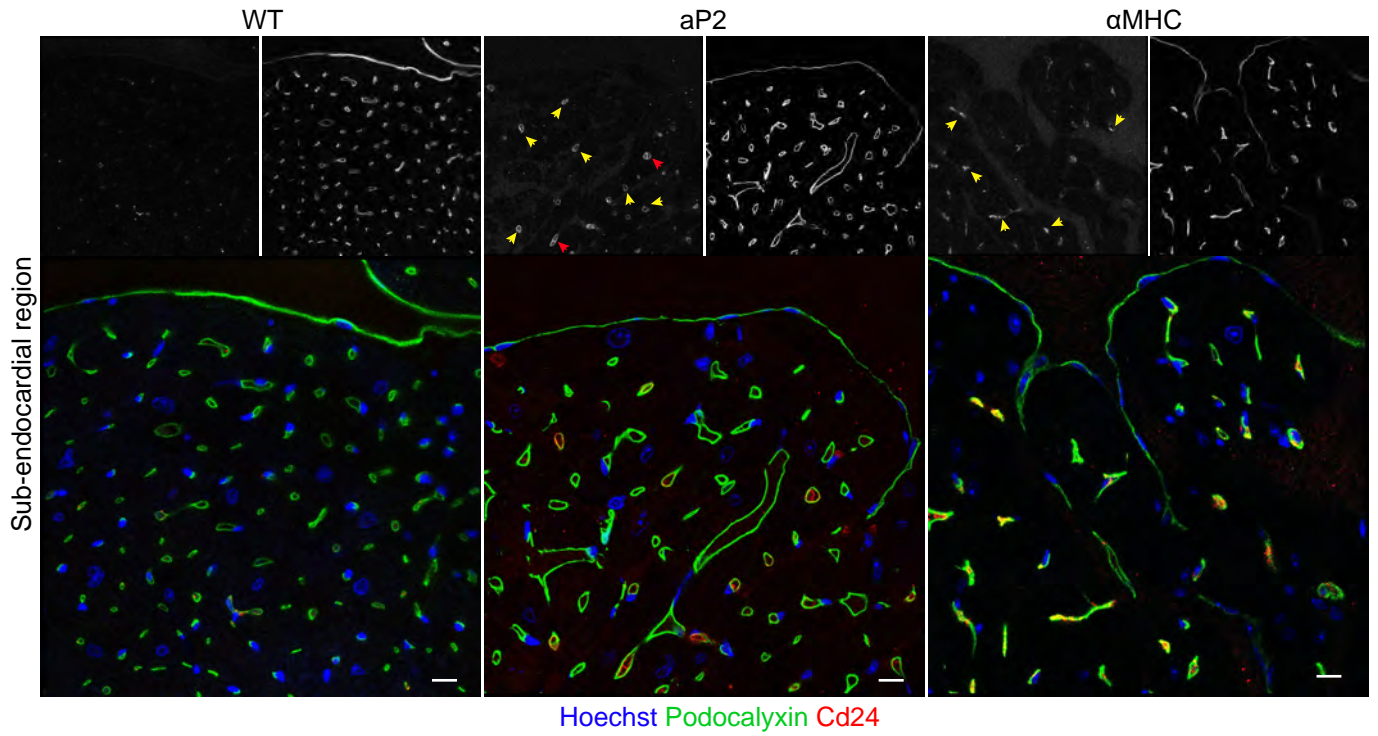**B**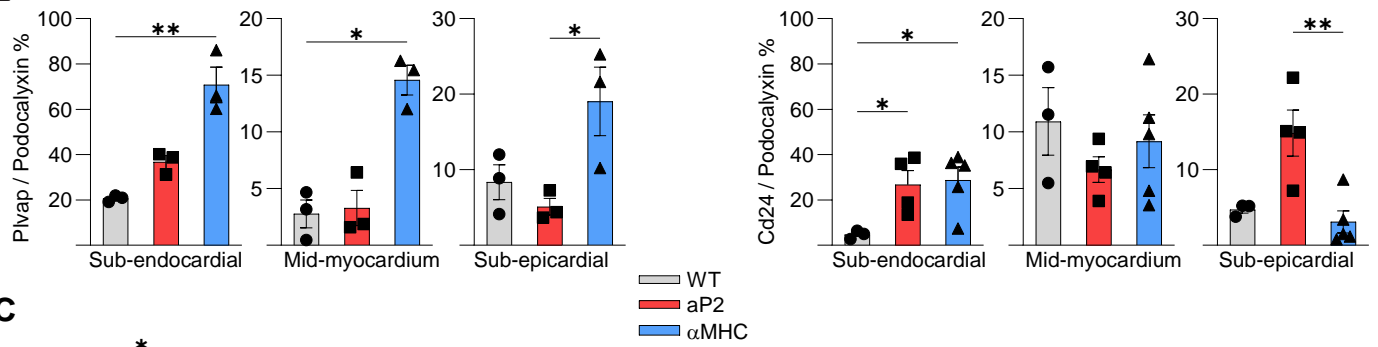**C**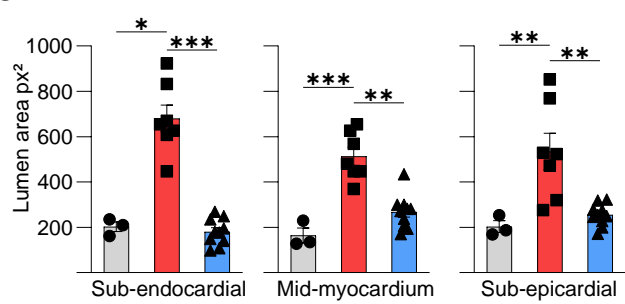

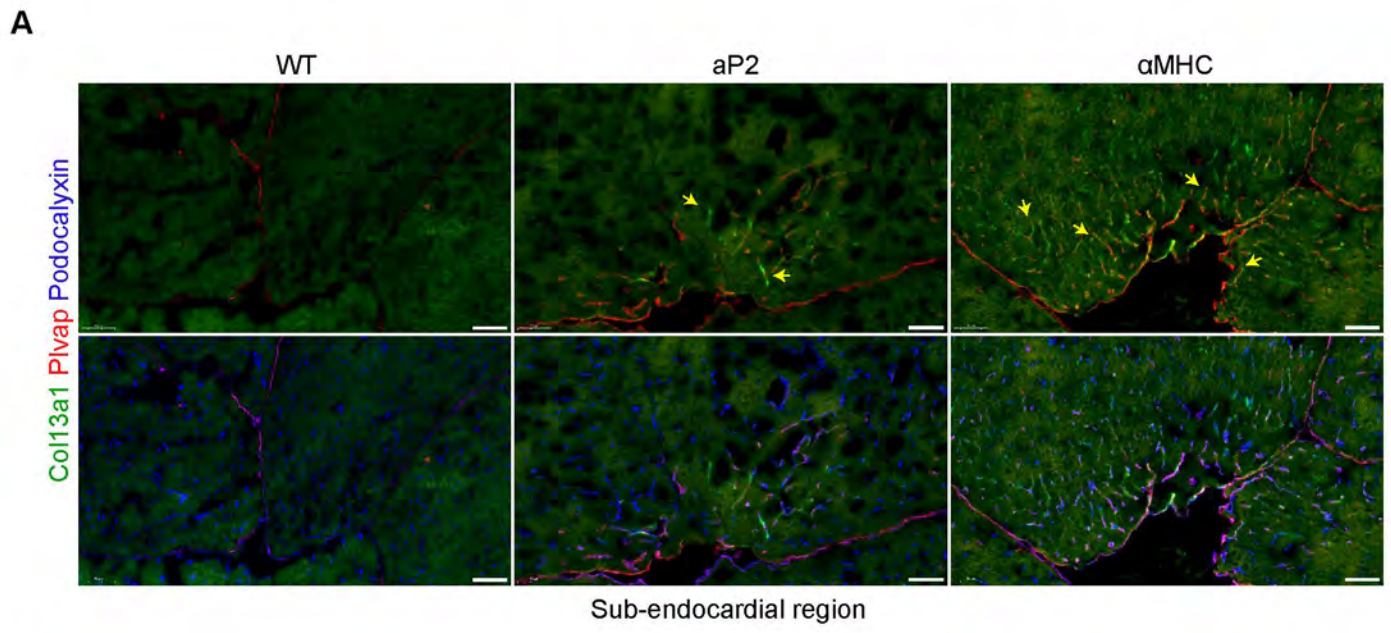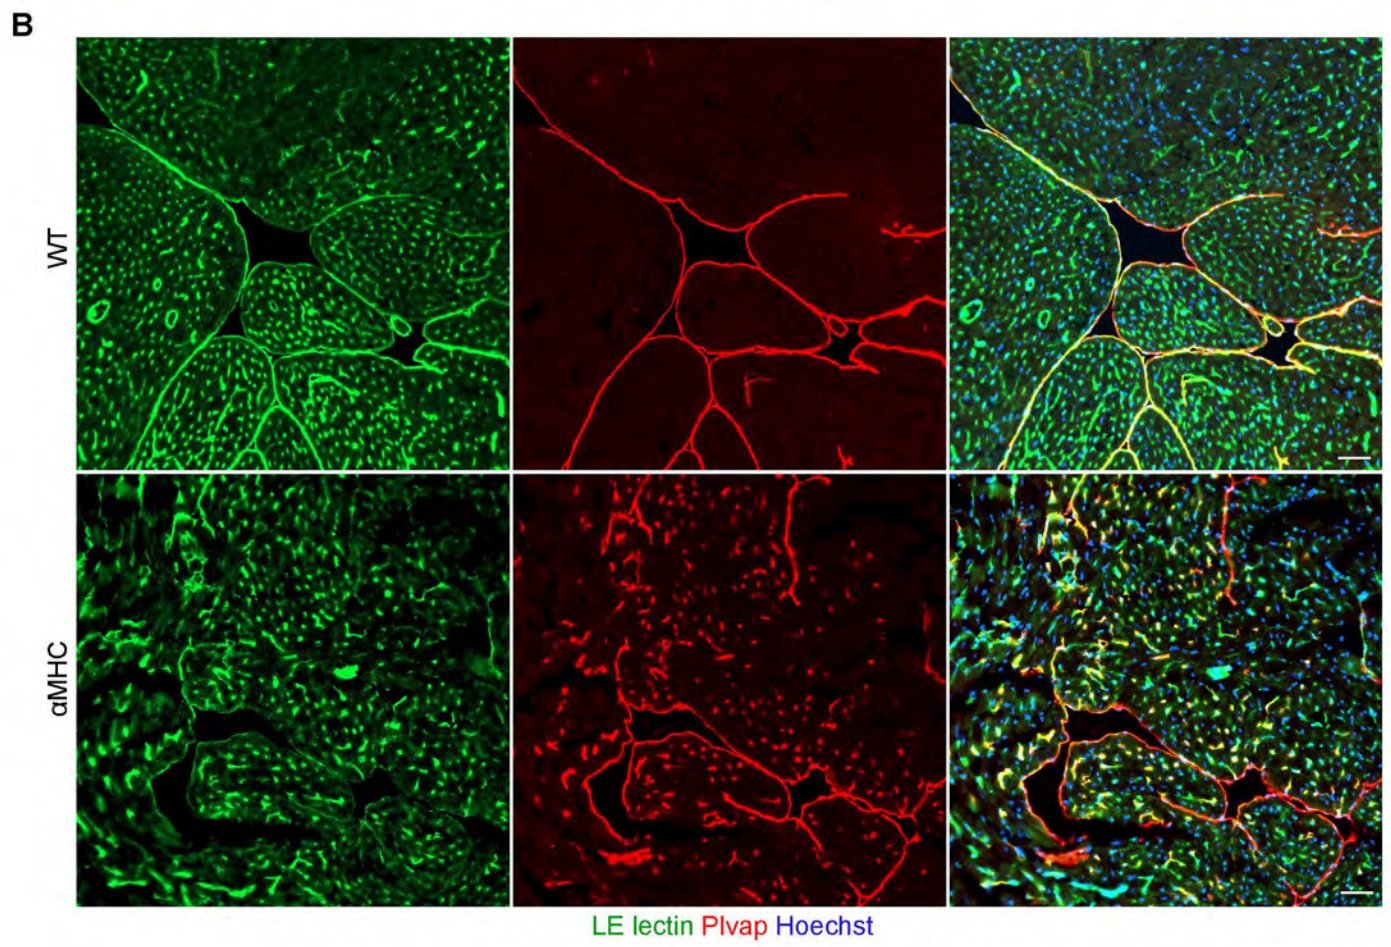

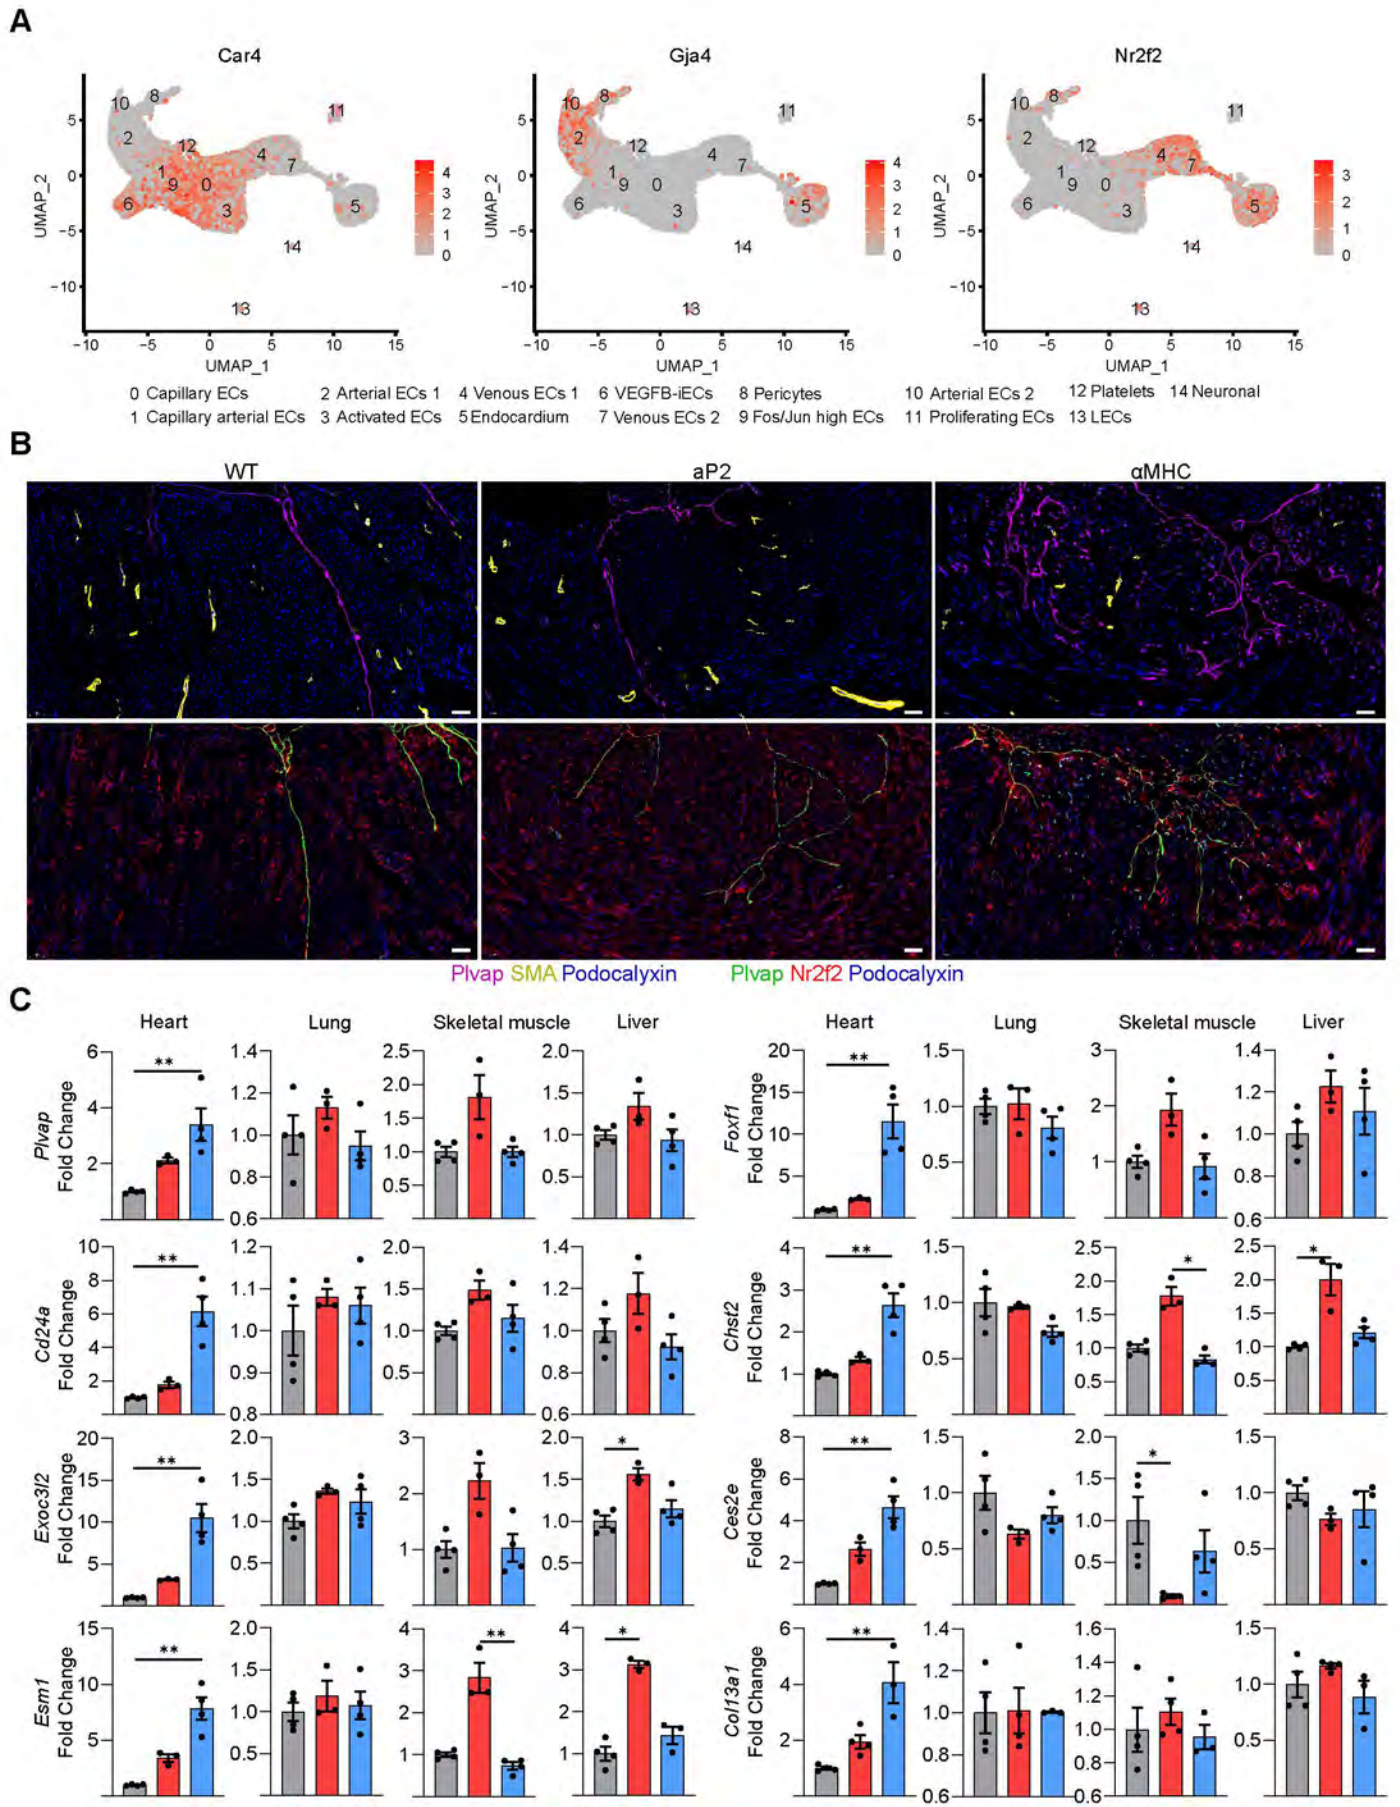

Supplemental figure 9

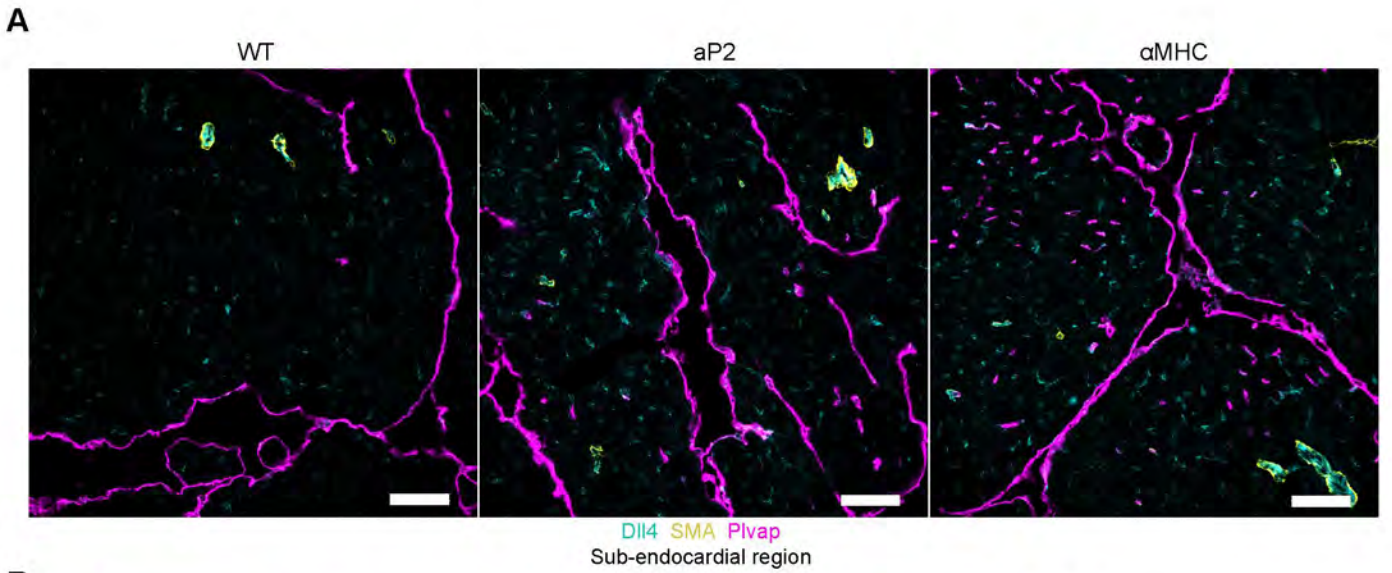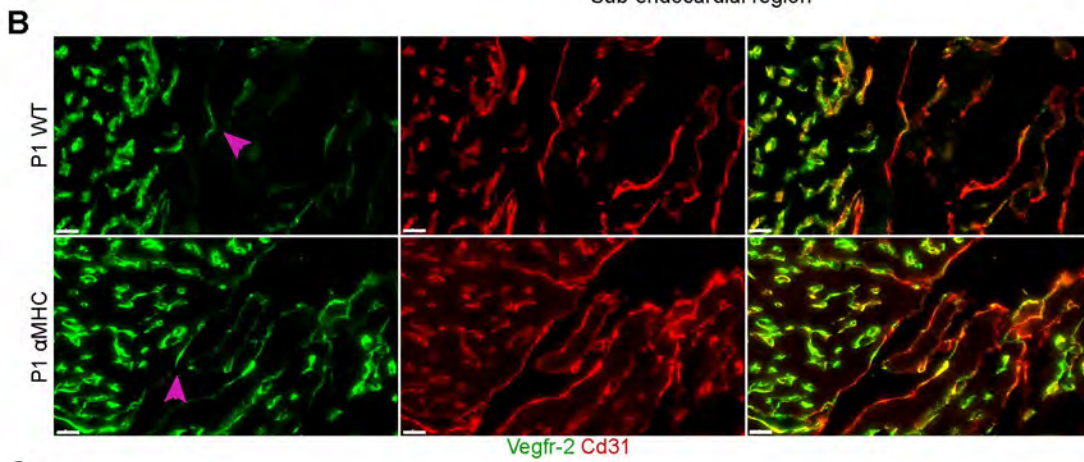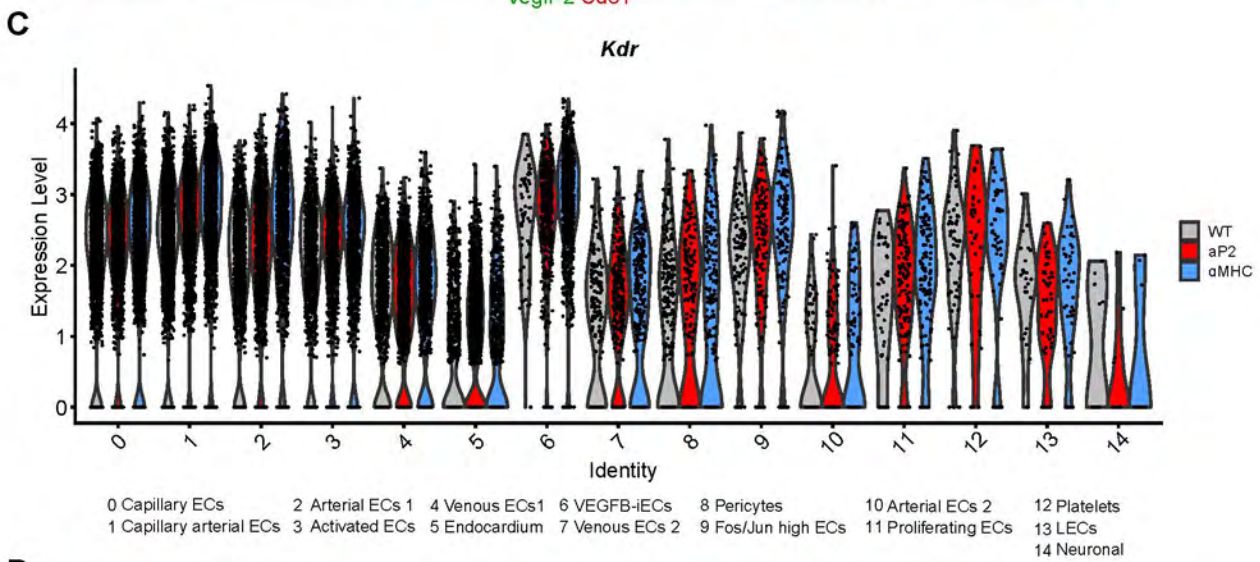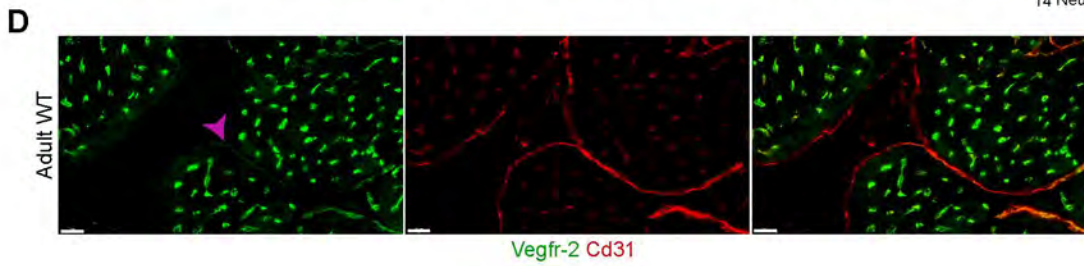



**A**

Tamoxifen / VEGFR-2 deletion

Sacrifice at 4-6 weeks

P1-P3

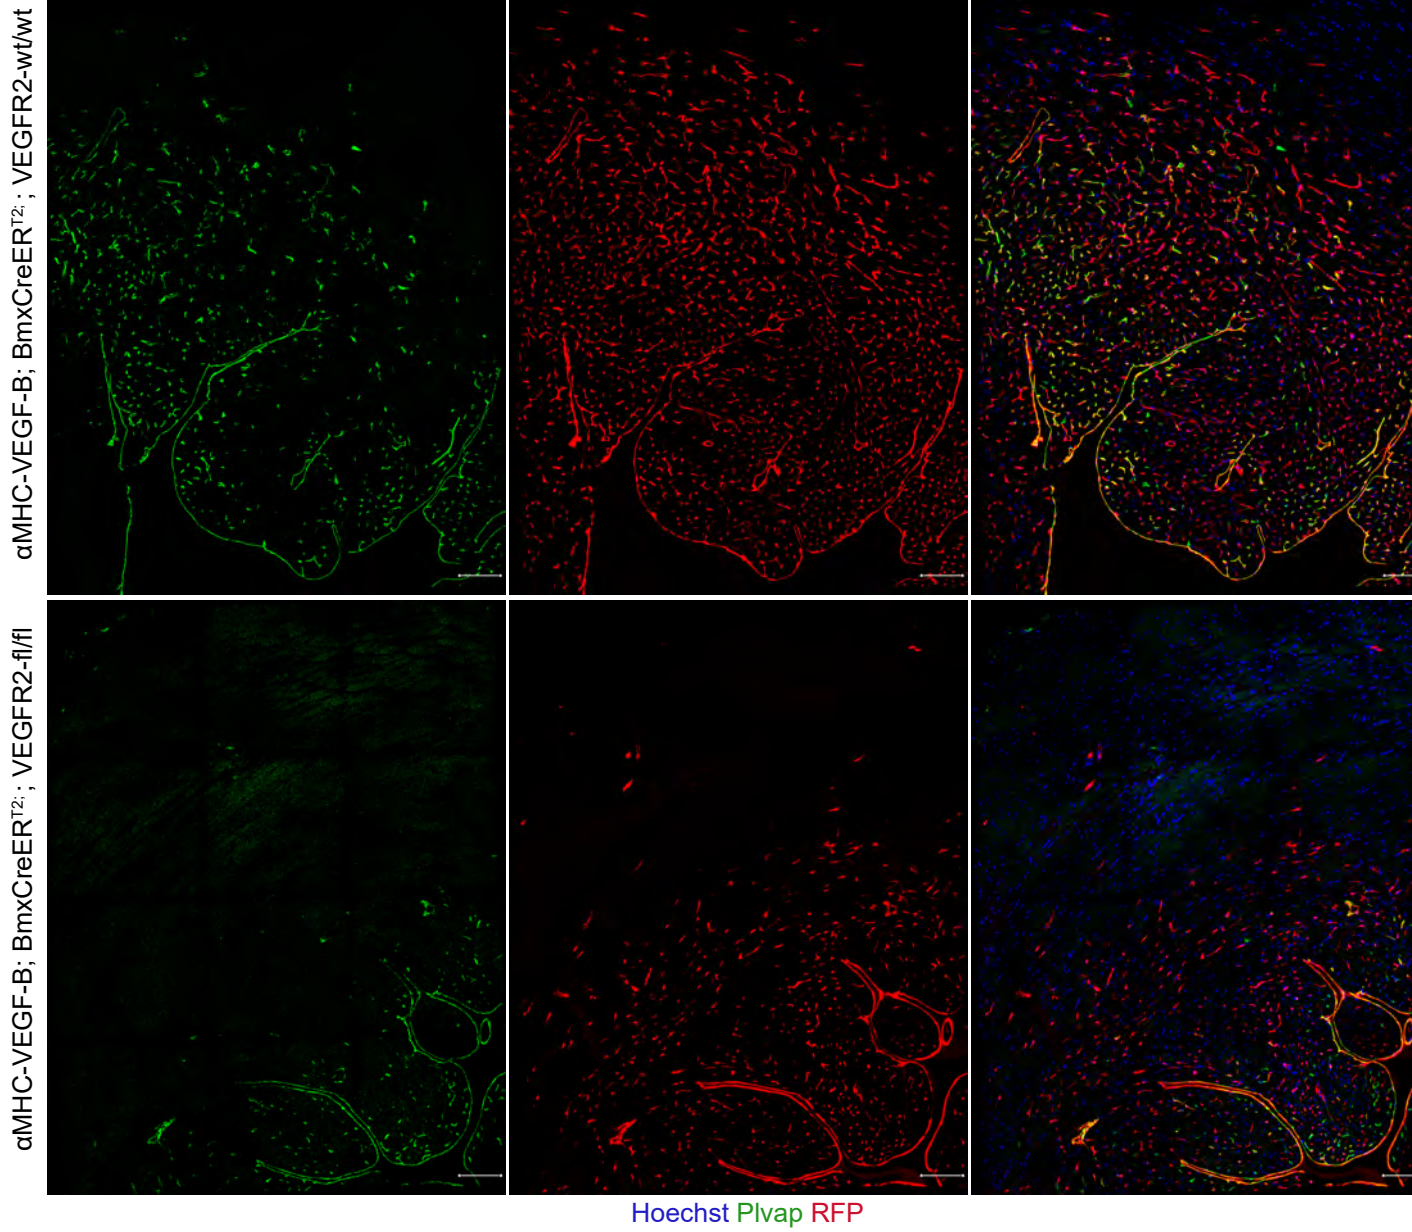

Supplemental figure 11

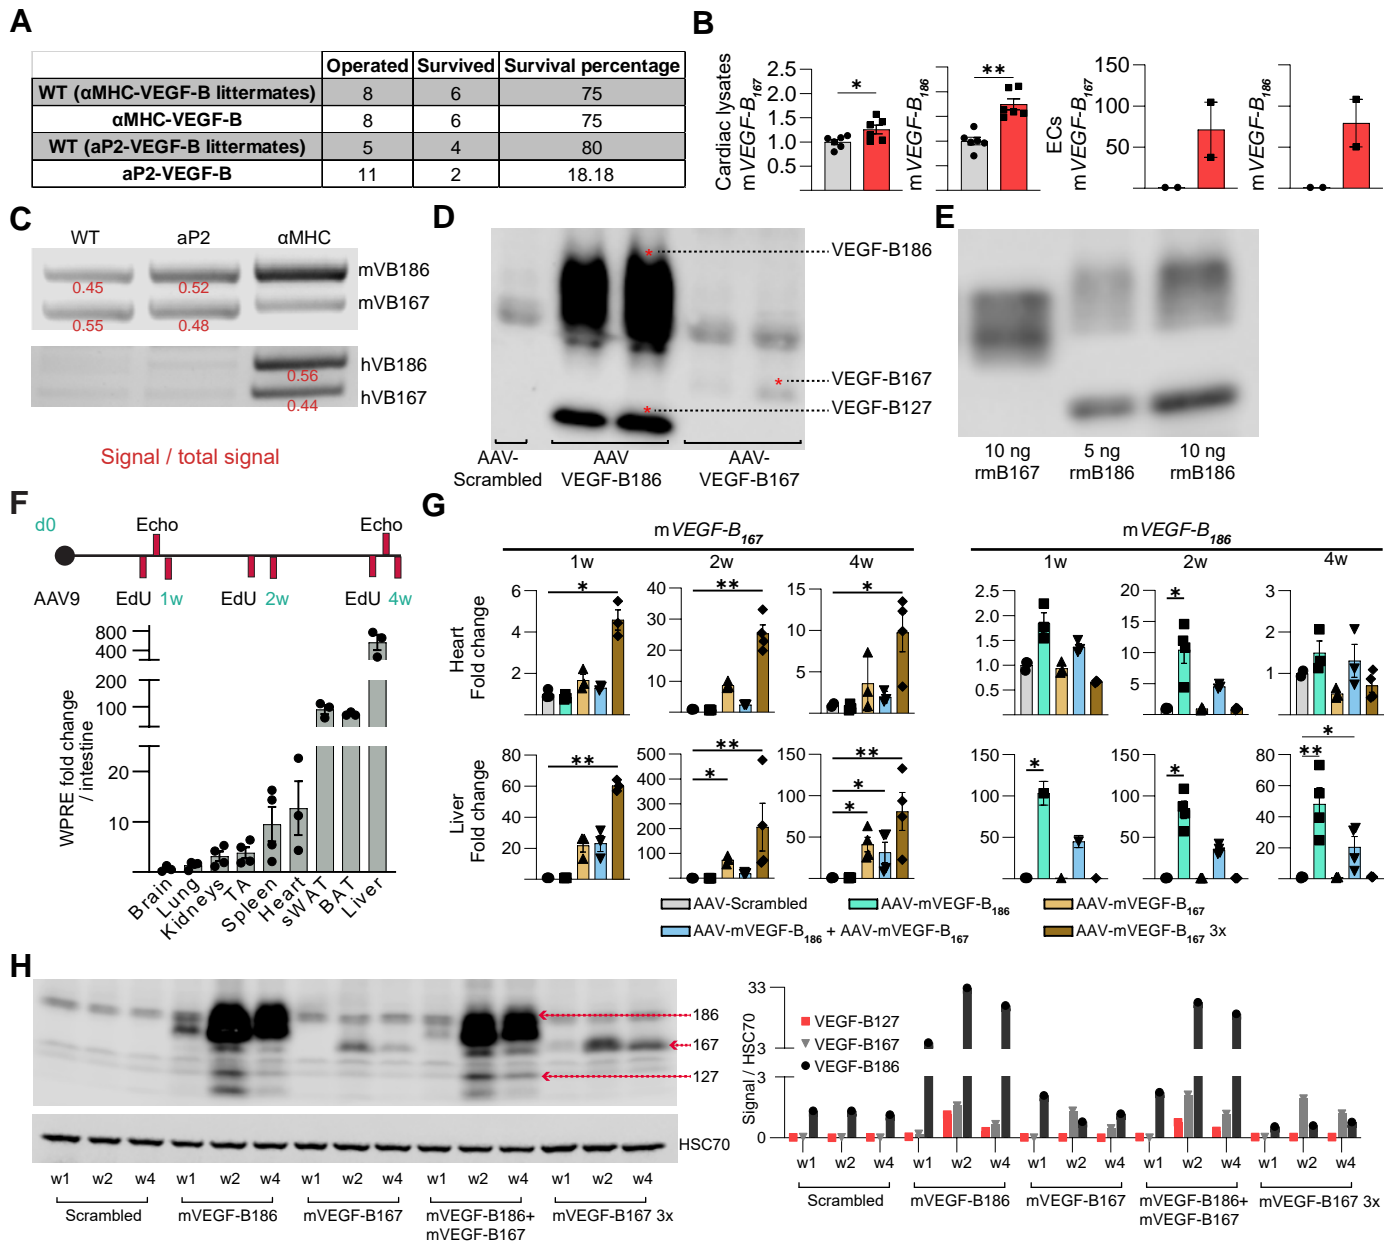

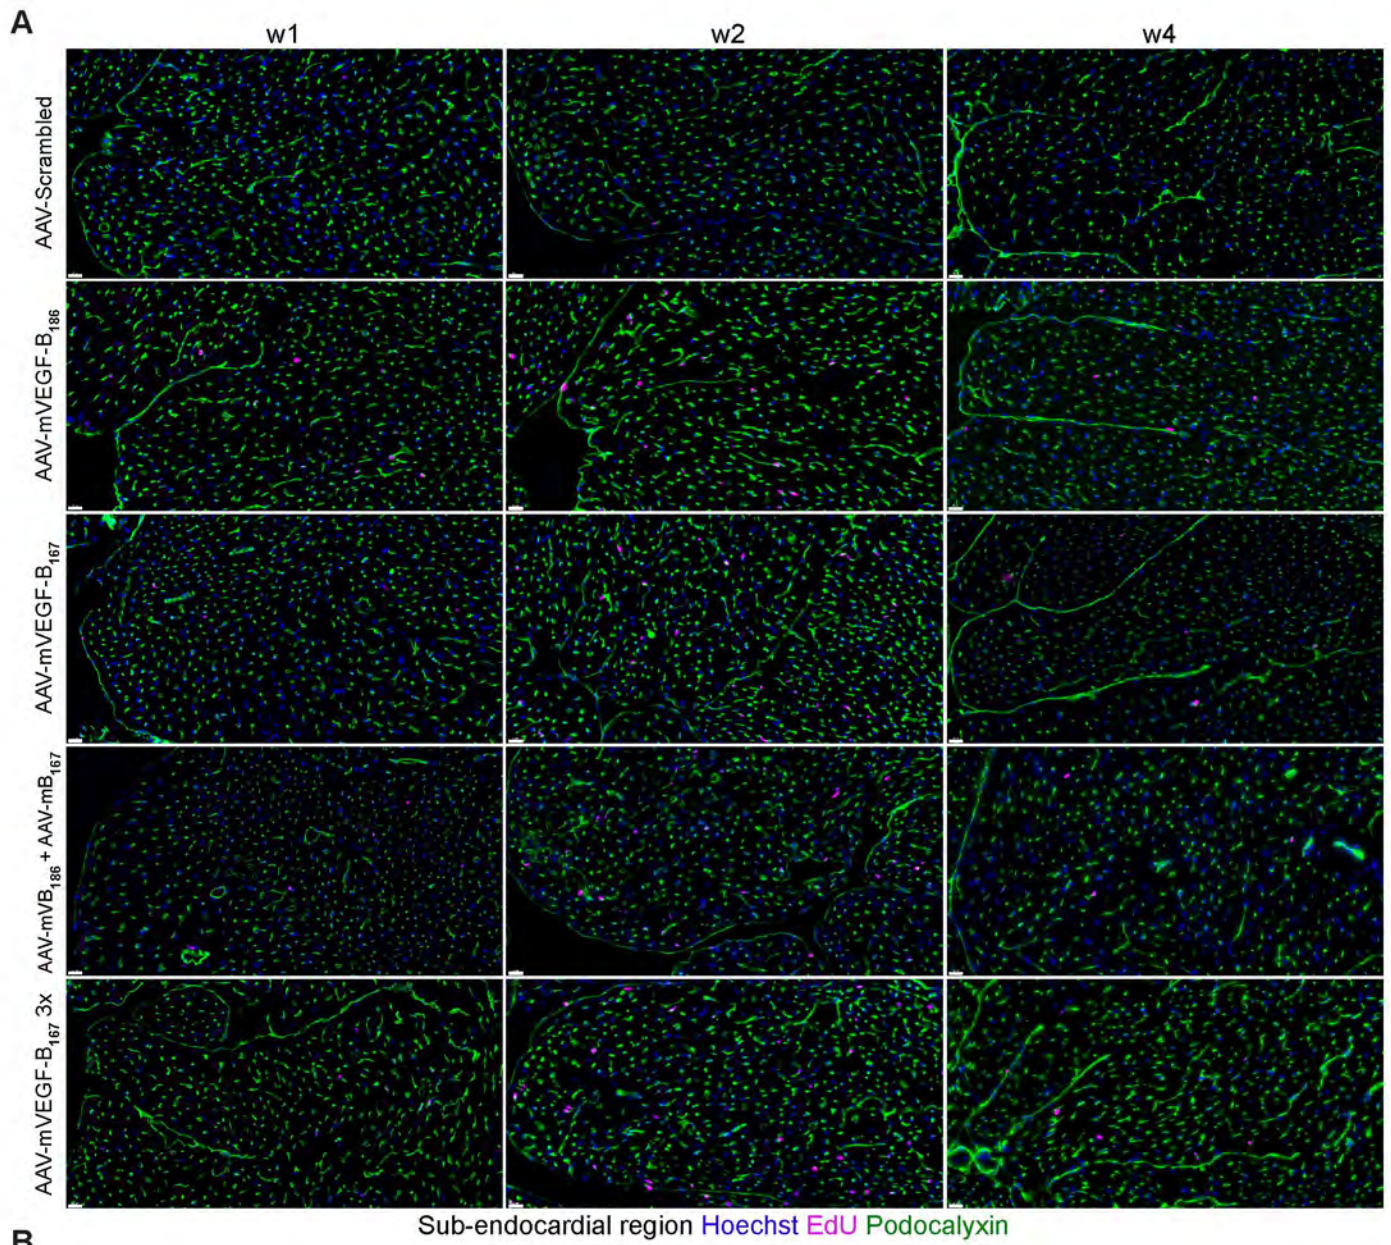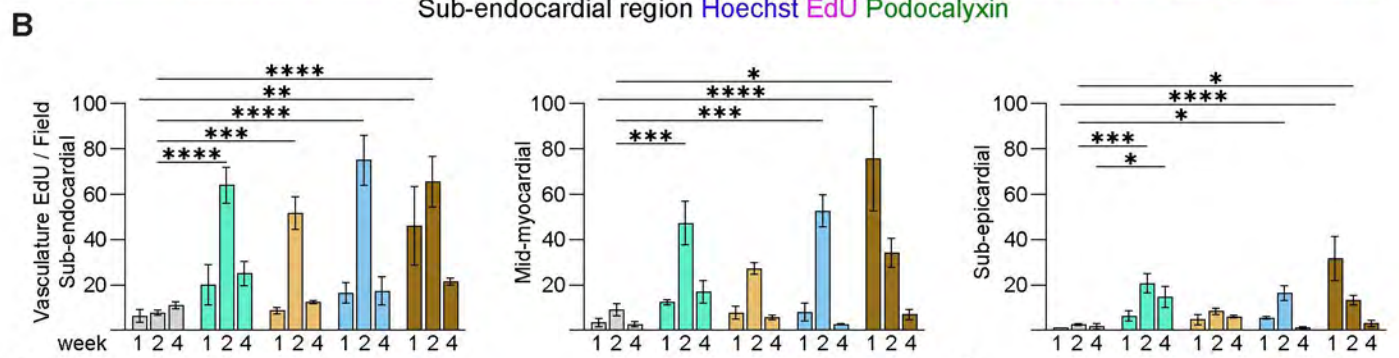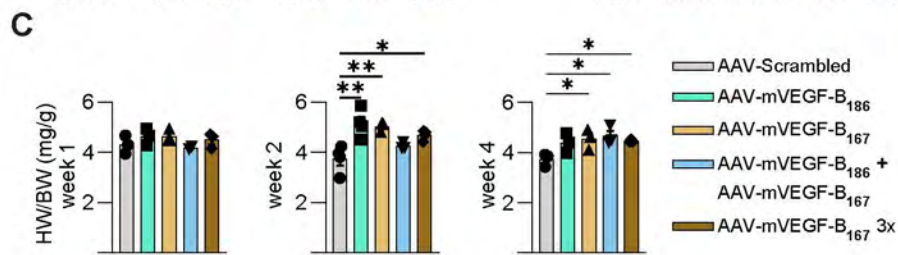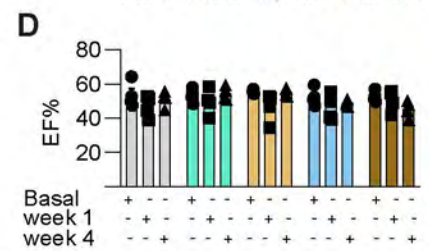

Supplemental figure 13

**A**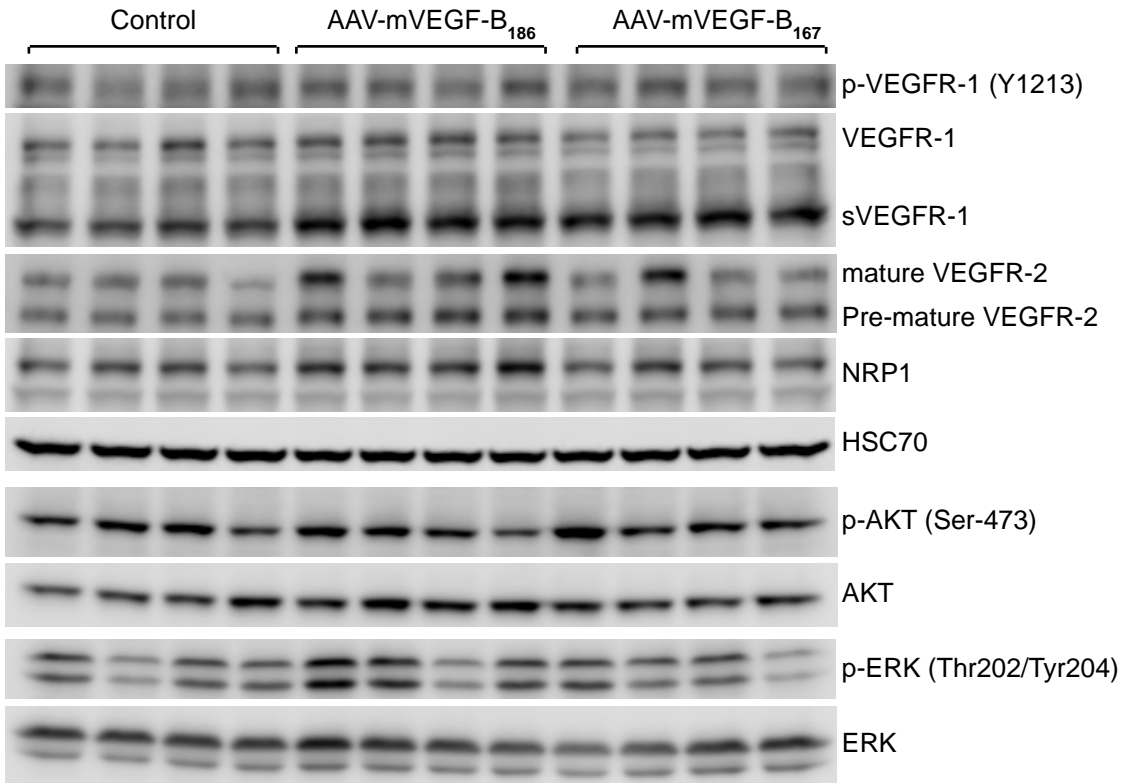**B**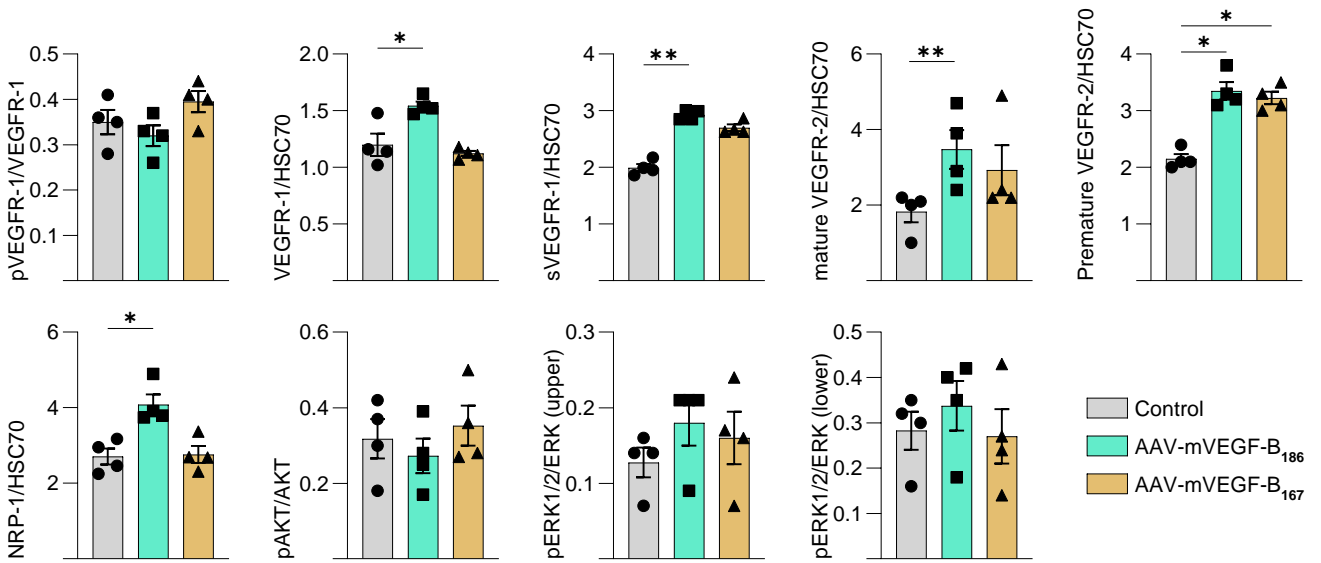

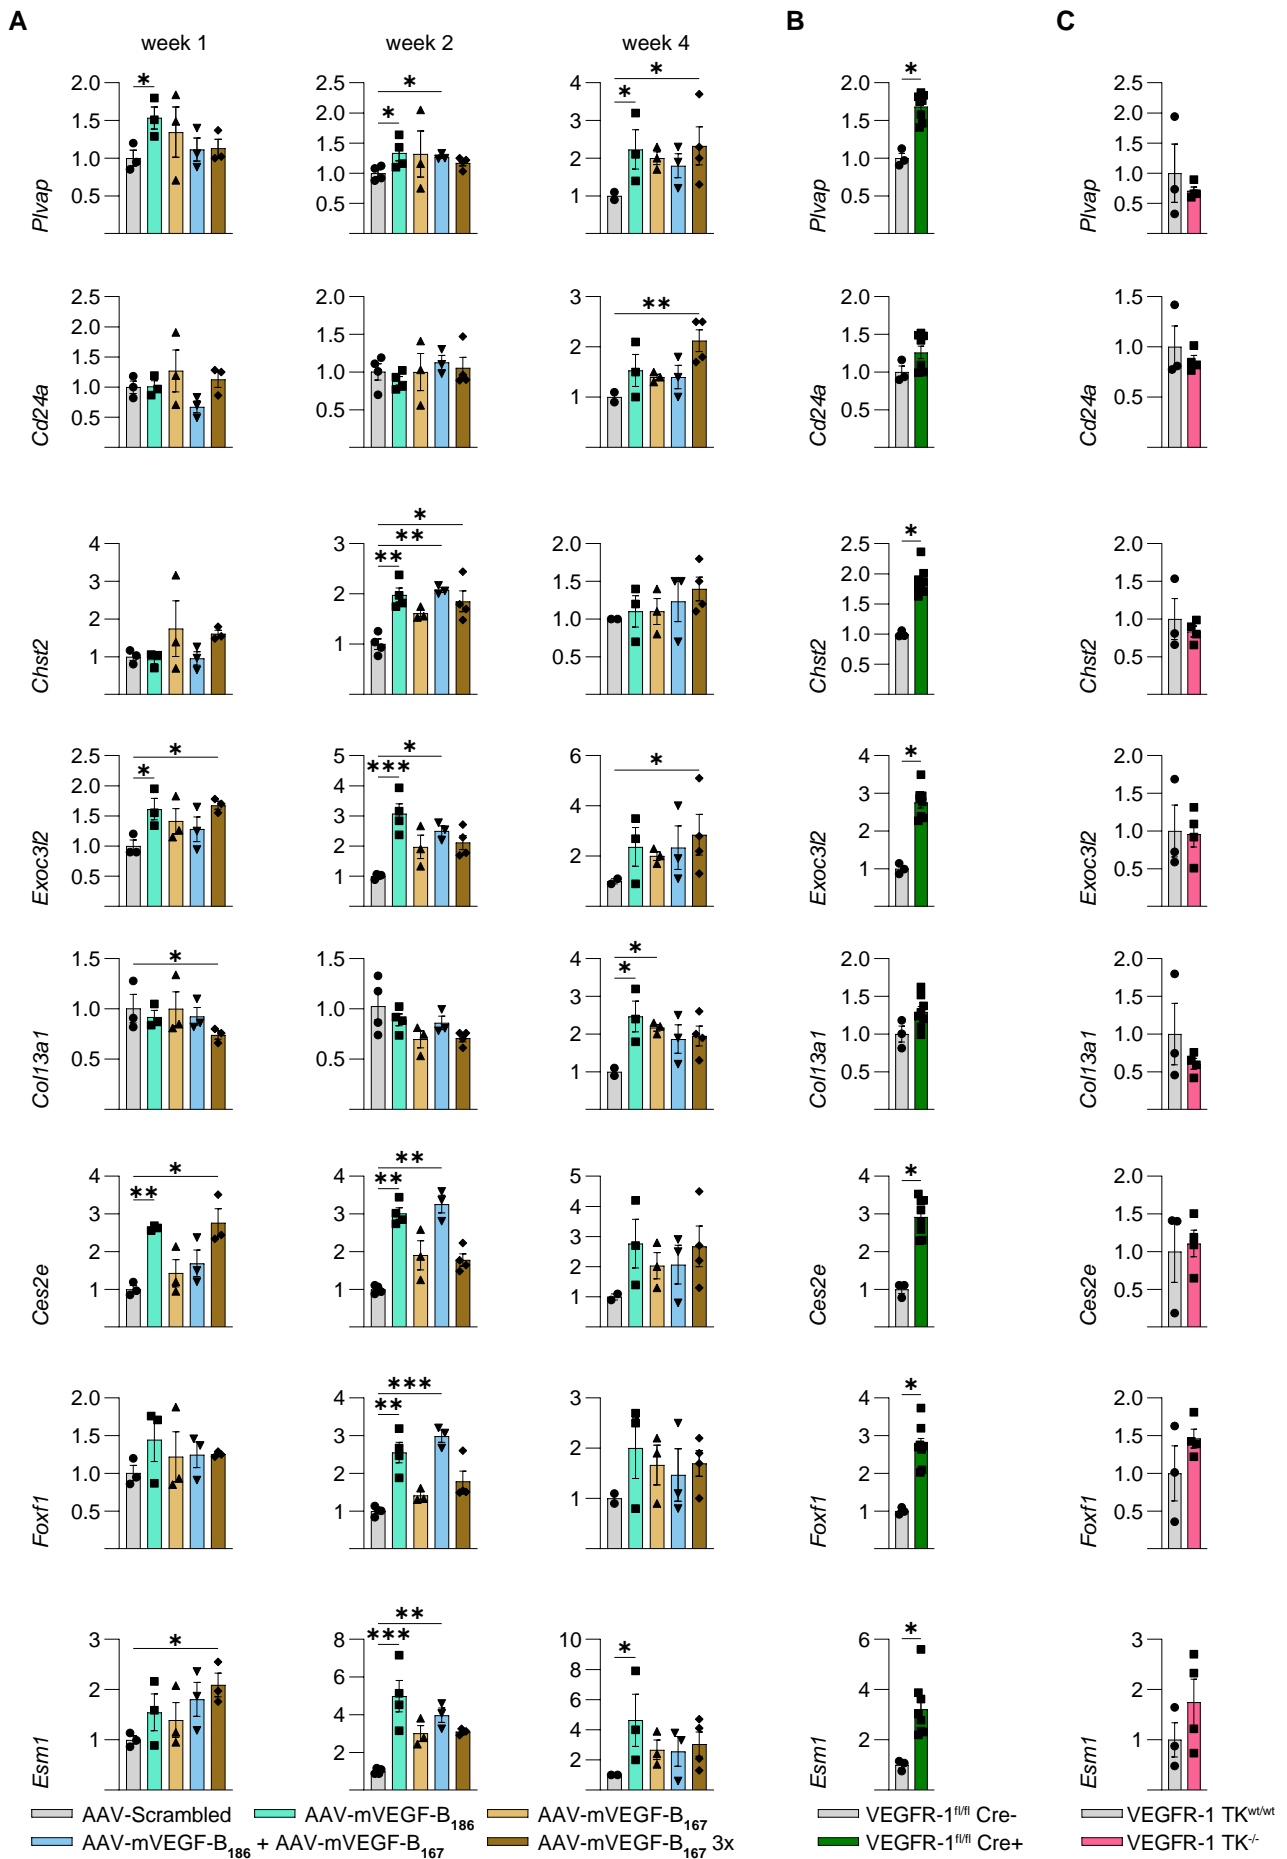

Supplemental figure 15

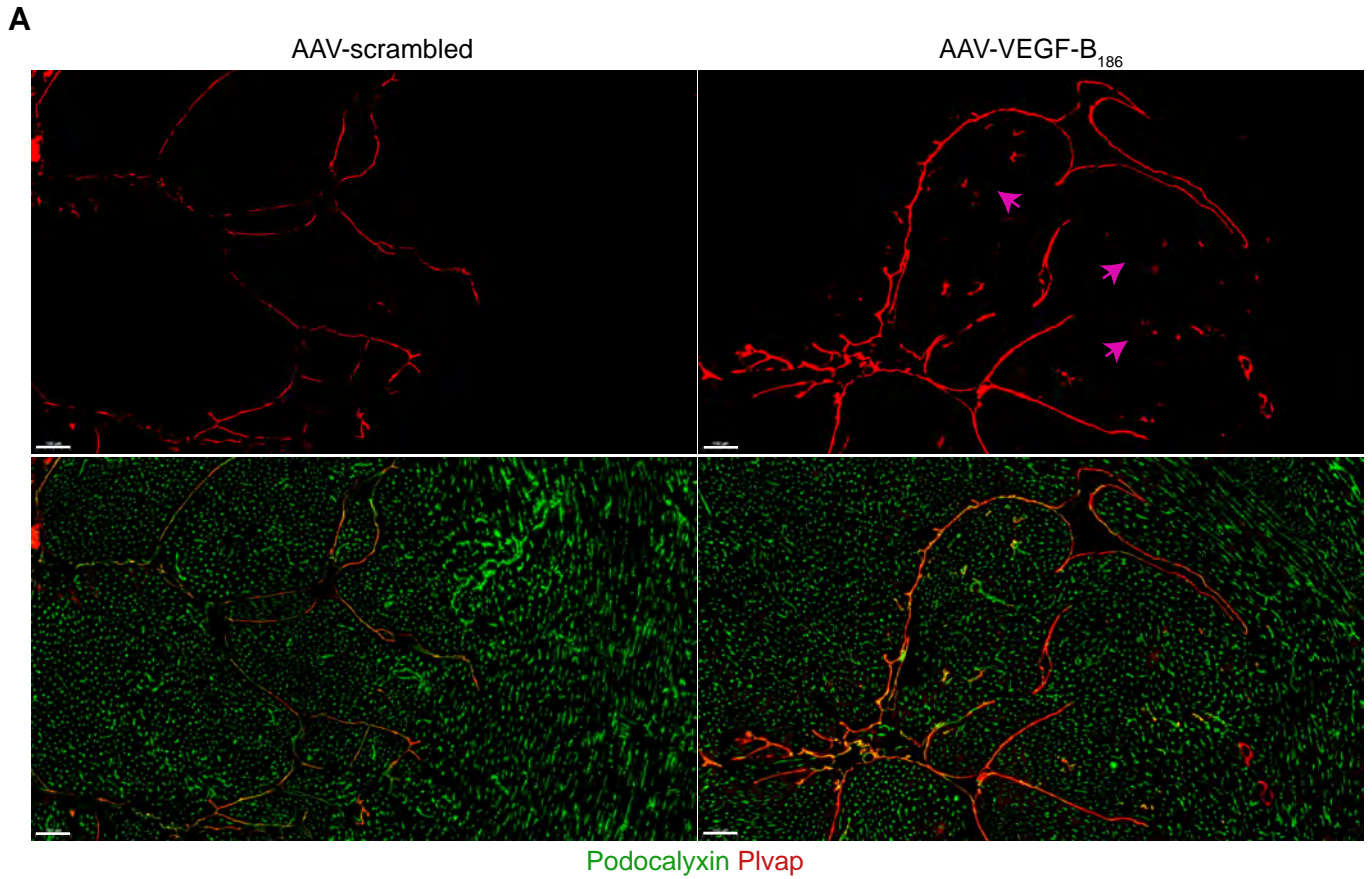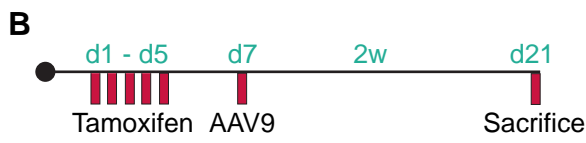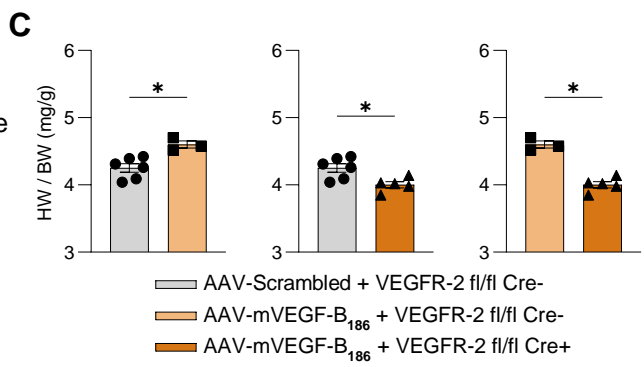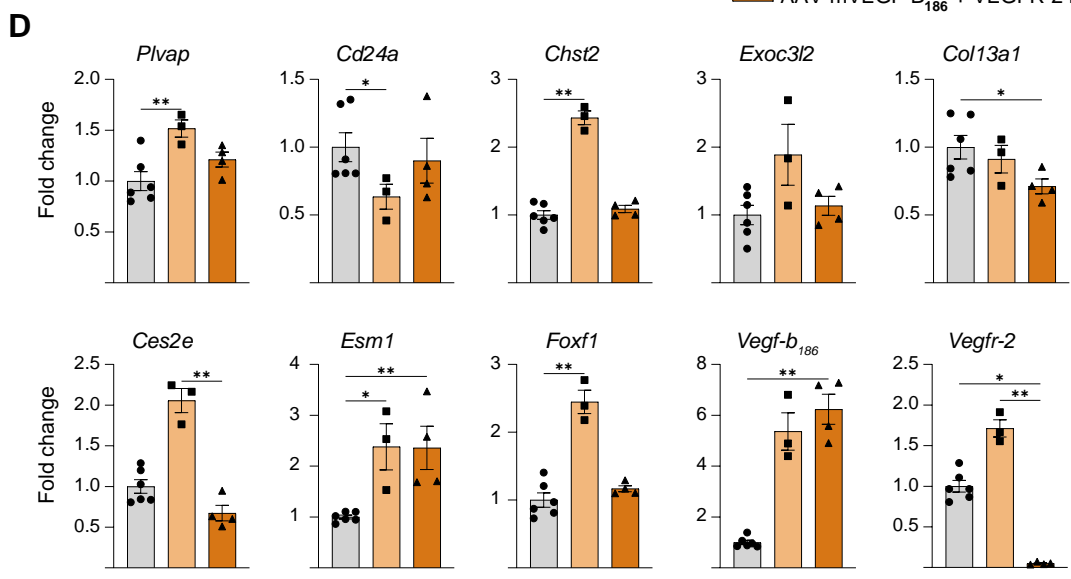

Supplemental figure 16
